# Supplementary material for: Genetic dissection of thousand-seed weight in linseed (Linum usitatissimum L.) using multi-locus genome-wide association study
Source: Front Plant Sci. 2023 Jun 2;14:1166728. doi: 10.3389/fpls.2023.1166728 (PMC10272591; doi:10.3389/fpls.2023.1166728)
Supplement: Supplementary file 4 [file Table_3.xlsx]

## Sheet: Sheet1
Supplementary Table 3. Total number of significant QTNs identified for TSW in five environments by five ML-GWAS methods
Environment	Method	QTN	Chromosome	Position (bp)	QTN effect	LOD score	-log10(p)	r2 (%)	MAF
AK18-19	mrMLM	Lu03_25720369	3	25720369	0.9512	8.8395	9.7521	25.5473	0.3867
AK18-19	mrMLM	Lu07_2061590	7	2061590	-0.8988	4.9775	5.7727	14.1684	0.4766
AK18-19	FASTmrMLM	Lu03_26447877	3	26447877	0.4833	3.3055	4.0196	5.1708	0.4538
AK18-19	FASTmrMLM	Lu06_13328461	6	13328461	0.553	3.0035	3.699	8.4986	0.2423
AK18-19	FASTmrMLM	Lu07_2061590	7	2061590	-0.8062	5.0622	5.8608	10.9046	0.4808
AK18-19	FASTmrMLM	Lu12_1284743	12	1284743	0.5824	5.8597	6.6879	7.6666	0.4115
AK18-19	FASTmrMLM	Lu14_17172543	14	17172543	-0.7778	9.4123	10.338	18.0398	0.35
AK18-19	FASTmrMLM	Lu15_12795055	15	12795055	0.5964	4.6466	5.428	4.581	0.3154
AK18-19	FASTmrEMMA	Lu03_25720369	3	25720369	1.8034	8.744	9.6543	23.0293	0.3885
AK18-19	pLARmEB	Lu01_10588059	1	10588059	0.0007	3.1118	3.8141	6.6693e-06	0.4385
AK18-19	pLARmEB	Lu05_13873867	5	13873867	0.6376	6.3843	7.23	6.9602	0.3346
AK18-19	pLARmEB	Lu11_4616700	11	4616700	0.7443	5.8266	6.6537	13.1832	0.2115
AK18-19	pLARmEB	Lu14_15884820	14	15884820	0.6555	7.1903	8.0603	9.146	0.4038
AK18-19	pLARmEB	Lu14_17172543	14	17172543	-0.9712	12.5741	13.5602	25.9825	0.35
AK18-19	ISIS EM-BLASSO	Lu03_16958776	3	16958776	0.6745	4.0515	4.8056	11.0495	0.2615
AK18-19	ISIS EM-BLASSO	Lu04_15178685	4	15178685	-0.7811	3.6623	4.3965	14.8364	0.25
AK18-19	ISIS EM-BLASSO	Lu05_1853936	5	1853936	0.74	3.906	4.6529	3.7858	0.2038
AK18-19	ISIS EM-BLASSO	Lu14_10297820	14	10297820	0.5964	3.4909	4.2156	8.5272	0.25
AK18-19	ISIS EM-BLASSO	Lu14_15885355	14	15885355	0.5377	5.5617	6.3793	5.2228	0.4038
AK18-19	ISIS EM-BLASSO	Lu14_17172543	14	17172543	-0.883	12.2394	13.2199	18.9748	0.35
AK19-20	mrMLM	Lu04_193594	4	193594	0.6519	3.2383	3.9484	7.0788	0.4688
AK19-20	mrMLM	Lu04_12076818	4	12076818	-1.0904	4.3401	5.1079	27.8794	0.2617
AK19-20	mrMLM	Lu07_1625677	7	1625677	-1.0368	3.981	4.7316	3.7302	0.4414
AK19-20	mrMLM	Lu12_5344617	12	5344617	0.6916	3.6901	4.4257	10.2606	0.2344
AK19-20	mrMLM	Lu14_17172491	14	17172491	-0.7064	4.7765	5.5634	11.7016	0.3516
AK19-20	mrMLM	Lu14_14411838	14	14411838	0.7433	6.3457	7.1901	9.2015	0.3594
AK19-20	FASTmrMLM	Lu02_4526997	2	4526997	0.6504	4.1237	4.8813	11.0498	0.2962
AK19-20	FASTmrMLM	Lu05_13783875	5	13783875	-1.0156	10.6002	11.5506	23.9453	0.2077
AK19-20	FASTmrMLM	Lu12_5344617	12	5344617	0.5878	4.0166	4.769	8.2858	0.2308
AK19-20	FASTmrMLM	Lu14_17110281	14	17110281	0.5046	3.5635	4.2923	6.6507	0.3346
AK19-20	pLARmEB	Lu02_21752266	2	21752266	0.4707	4.4175	5.1888	4.6605	0.2615
AK19-20	pLARmEB	Lu05_13783875	5	13783875	-0.6416	4.9452	5.7391	8.763	0.2077
AK19-20	pLARmEB	Lu06_1935251	6	1935251	-0.5982	3.5747	4.3041	8.4391	0.2308
AK19-20	pLARmEB	Lu09_7554199	9	7554199	0.7499	8.2303	9.1282	4.5313	0.2692
AK19-20	pLARmEB	Lu09_16956184	9	16956184	0.8023	4.2156	4.9776	2.7252	0.4423
AK19-20	pLARmEB	Lu12_4359299	12	4359299	0.6203	5.0551	5.8534	9.1707	0.2923
AK19-20	pLARmEB	Lu14_3479083	14	3479083	0.5456	4.6934	5.4768	7.0184	0.2923
AK19-20	pLARmEB	Lu15_7189751	15	7189751	-0.7675	5.6391	6.4595	14.1072	0.2423
AK19-20	ISIS EM-BLASSO	Lu01_3743383	1	3743383	0.5386	3.7808	4.5212	9.6838	0.2385
AK19-20	ISIS EM-BLASSO	Lu06_1935251	6	1935251	-0.7143	4.3506	5.1189	18.6565	0.2308
AK19-20	ISIS EM-BLASSO	Lu14_16375924	14	16375924	0.7421	5.0516	5.8498	6.3602	0.2654
DL17-18	mrMLM	Lu01_10099509	1	10099509	0.827	4.9161	5.7088	9.5304	0.2266
DL17-18	mrMLM	Lu03_25087235	3	25087235	0.8134	6.5659	7.4173	10.0501	0.3945
DL17-18	mrMLM	Lu05_285281	5	285281	0.8597	5.4666	6.2807	4.1395	0.2852
DL17-18	mrMLM	Lu07_1625677	7	1625677	-1.2876	4.4588	5.232	3.8157	0.4414
DL17-18	mrMLM	Lu07_3130629	7	3130629	-0.8604	4.8247	5.6137	10.4258	0.2227
DL17-18	mrMLM	Lu09_17509381	9	17509381	1.1499	8.7169	9.6266	19.749	0.3594
DL17-18	mrMLM	Lu12_17209277	12	17209277	-1.7083	4.5394	5.3161	11.7027	0.4727
DL17-18	mrMLM	Lu14_14605949	14	14605949	0.6669	3.8213	4.5638	6.3878	0.4688
DL17-18	FASTmrMLM	Lu01_10099509	1	10099509	0.7031	4.6118	5.3917	7.4048	0.2231
DL17-18	FASTmrMLM	Lu09_17509381	9	17509381	1.0925	7.1599	8.0291	19.1658	0.3615
DL17-18	FASTmrMLM	Lu14_5466654	14	5466654	-0.9258	3.6011	4.3319	14.1713	0.2577
DL17-18	FASTmrMLM	Lu14_14605949	14	14605949	0.6651	4.3492	5.1174	6.8327	0.4615
DL17-18	pLARmEB	Lu04_8901147	4	8901147	0.9058	6.888	7.7492	7.1632	0.1462
DL17-18	pLARmEB	Lu07_3130629	7	3130629	-0.8867	7.2663	8.1385	9.4414	0.2192
DL17-18	pLARmEB	Lu09_17509381	9	17509381	0.9842	8.0133	8.9056	12.3343	0.3615
DL17-18	pLARmEB	Lu14_4777667	14	4777667	-0.7732	4.8043	5.5924	7.7433	0.3
DL17-18	pLARmEB	Lu14_5466654	14	5466654	-1.0574	8.14	9.0356	14.6592	0.2577
DL17-18	pLARmEB	Lu14_14605949	14	14605949	0.5781	4.7571	5.5432	4.0929	0.4615
DL17-18	pLARmEB	Lu15_2591369	15	2591369	0.4978	3.349	4.0656	3.1745	0.3038
DL17-18	pLARmEB	Lu15_4120547	15	4120547	1.2249	7.731	8.6159	19.6722	0.2769
DL17-18	ISIS EM-BLASSO	Lu01_25320812	1	25320812	-0.3985	3.091	3.792	1.8355	0.4885
DL17-18	ISIS EM-BLASSO	Lu05_13783875	5	13783875	-0.6607	4.5683	5.3463	5.8975	0.2077
DL17-18	ISIS EM-BLASSO	Lu06_15926914	6	15926914	0.5911	5.8791	6.708	5.1797	0.3385
DL17-18	ISIS EM-BLASSO	Lu07_2061590	7	2061590	-0.8621	6.1568	6.9951	6.3786	0.4808
DL17-18	ISIS EM-BLASSO	Lu11_6195027	11	6195027	0.5315	4.0633	4.818	3.3302	0.45
DL17-18	ISIS EM-BLASSO	Lu12_18266145	12	18266145	-0.5016	3.5239	4.2505	2.5949	0.4654
DL17-18	ISIS EM-BLASSO	Lu13_10606707	13	10606707	-1.1815	6.3474	7.1919	7.6681	0.4846
DL17-18	ISIS EM-BLASSO	Lu14_15939213	14	15939213	-1.173	7.1207	7.9887	14.5557	0.4154
DL17-18	ISIS EM-BLASSO	Lu15_4120547	15	4120547	1.3812	10.1383	11.0794	28.7756	0.2769
DL18-19	mrMLM	Lu03_19423426	3	19423426	0.8183	3.8773	4.6227	10.3655	0.2461
DL18-19	mrMLM	Lu03_25577301	3	25577301	0.5912	5.6186	6.4383	4.4586	0.4414
DL18-19	mrMLM	Lu04_15178685	4	15178685	-1.3589	11.9018	12.8764	28.8933	0.25
DL18-19	mrMLM	Lu04_19849582	4	19849582	-0.852	3.7178	4.4549	7.0644	0.4609
DL18-19	mrMLM	Lu05_13873867	5	13873867	0.4533	3.8501	4.5941	1.9999	0.332
DL18-19	mrMLM	Lu06_15152239	6	15152239	0.8579	5.1852	5.9887	5.5009	0.3125
DL18-19	mrMLM	Lu09_17509381	9	17509381	0.6738	4.9587	5.7532	6.8259	0.3594
DL18-19	mrMLM	Lu12_3248052	12	3248052	-0.502	3.8404	4.5839	2.8027	0.3359
DL18-19	mrMLM	Lu13_14080344	13	14080344	-0.9413	5.0764	5.8756	9.8534	0.4336
DL18-19	mrMLM	Lu15_3419796	15	3419796	0.5893	3.6835	4.4188	3.6767	0.1797
DL18-19	FASTmrMLM	Lu03_12371782	3	12371782	-1.014	5.2468	6.0526	7.5045	0.4808
DL18-19	FASTmrMLM	Lu03_19423426	3	19423426	1.0112	7.0369	7.9025	16.2222	0.2423
DL18-19	FASTmrMLM	Lu04_15178685	4	15178685	-1.446	9.6111	10.5411	33.529	0.25
DL18-19	FASTmrMLM	Lu08_18395581	8	18395581	0.5146	3.8156	4.5578	1.634	0.2654
DL18-19	FASTmrMLM	Lu09_809203	9	809203	0.5449	5.0381	5.8358	3.6825	0.4269
DL18-19	FASTmrMLM	Lu12_3147588	12	3147588	0.4281	3.4	4.1196	1.0592	0.4577
DL18-19	FASTmrMLM	Lu12_3248052	12	3248052	-0.4926	4.8141	5.6026	2.7661	0.3462
DL18-19	FASTmrMLM	Lu15_12795055	15	12795055	0.7007	5.349	6.1587	3.4021	0.3154
DL18-19	FASTmrEMMA	Lu02_5448811	2	5448811	1.4206	3.9819	4.7326	6.7306	0.2731
DL18-19	FASTmrEMMA	Lu04_18087236	4	18087236	1.2881	3.3381	4.0541	4.772	0.3192
DL18-19	FASTmrEMMA	Lu11_6337683	11	6337683	1.6743	4.8406	5.6302	11.844	0.4385
DL18-19	FASTmrEMMA	Lu12_1284743	12	1284743	1.5244	5.8881	6.7173	8.8687	0.4115
DL18-19	FASTmrEMMA	Lu12_3147588	12	3147588	1.4041	3.8718	4.6169	3.1952	0.4577
DL18-19	pLARmEB	Lu02_3984384	2	3984384	0.7159	6.9549	7.8181	8.9108	0.2577
DL18-19	pLARmEB	Lu02_22966267	2	22966267	-0.6028	7.2404	8.1119	5.6589	0.3769
DL18-19	pLARmEB	Lu04_15178685	4	15178685	-0.9449	6.6711	7.5258	15.5072	0.25
DL18-19	pLARmEB	Lu05_5724521	5	5724521	-0.6176	6.4283	7.2754	6.367	0.3385
DL18-19	pLARmEB	Lu06_15152239	6	15152239	0.6105	5.5964	6.4153	3.0925	0.3154
DL18-19	pLARmEB	Lu11_3377181	11	3377181	0.6773	10.2623	11.206	7.7467	0.3385
DL18-19	pLARmEB	Lu11_4146011	11	4146011	0.5207	5.725	6.5485	3.4985	0.4385
DL18-19	pLARmEB	Lu13_10606707	13	10606707	-0.7537	3.7258	4.4633	3.556	0.4846
DL18-19	pLARmEB	Lu13_11121621	13	11121621	-0.6191	4.9844	5.7799	6.6072	0.2308
DL18-19	pLARmEB	Lu13_17901403	13	17901403	0.4977	3.5433	4.271	4.0453	0.4962
DL18-19	pLARmEB	Lu14_3479083	14	3479083	0.5142	3.9122	4.6594	4.5091	0.2923
DL18-19	pLARmEB	Lu14_15884820	14	15884820	0.5394	5.0829	5.8823	3.9082	0.4038
DL18-19	ISIS EM-BLASSO	Lu01_25320875	1	25320875	-0.4313	3.1396	3.8437	2.8411	0.4654
DL18-19	ISIS EM-BLASSO	Lu03_19423386	3	19423386	0.6812	3.6926	4.4284	8.8603	0.2154
DL18-19	ISIS EM-BLASSO	Lu04_15178685	4	15178685	-1.1473	8.1363	9.0318	25.9974	0.25
DL18-19	ISIS EM-BLASSO	Lu06_15152239	6	15152239	0.9968	7.0285	7.8939	9.3721	0.3154
DL18-19	ISIS EM-BLASSO	Lu11_6337683	11	6337683	0.49	3.4123	4.1326	4.0435	0.4385
DL18-19	ISIS EM-BLASSO	Lu12_3147588	12	3147588	0.5689	3.2811	3.9937	2.3031	0.4577
DL18-19	ISIS EM-BLASSO	Lu13_10606613	13	10606613	-0.9114	4.8684	5.6592	5.9106	0.4808
DL19-20	mrMLM	Lu01_5723512	1	5723512	0.6056	4.597	5.3763	5.8868	0.4258
DL19-20	mrMLM	Lu02_22847296	2	22847296	-0.6648	4.3779	5.1474	7.1152	0.3242
DL19-20	mrMLM	Lu04_15178685	4	15178685	-1.5357	8.4465	9.3497	37.9671	0.25
DL19-20	mrMLM	Lu12_5344617	12	5344617	0.9624	5.2474	6.0533	13.6502	0.2344
DL19-20	mrMLM	Lu12_3841469	12	3841469	-0.8905	3.3232	4.0383	7.1864	0.4688
DL19-20	FASTmrMLM	Lu01_5723512	1	5723512	0.4768	3.7113	4.4481	3.9056	0.4269
DL19-20	FASTmrMLM	Lu02_4526841	2	4526841	0.5228	3.5841	4.314	4.6944	0.2654
DL19-20	FASTmrMLM	Lu02_22847296	2	22847296	-0.5971	3.8713	4.6164	6.1414	0.3192
DL19-20	FASTmrMLM	Lu03_12371782	3	12371782	-0.8257	4.201	4.9623	5.3447	0.4808
DL19-20	FASTmrMLM	Lu04_15178685	4	15178685	-1.498	11.8954	12.8699	38.6544	0.25
DL19-20	FASTmrMLM	Lu12_5344617	12	5344617	0.809	5.3317	6.1408	10.3216	0.2308
DL19-20	FASTmrEMMA	Lu01_1553082	1	1553082	-0.0006	4.2361	4.999	1.8258e-06	0.4577
DL19-20	pLARmEB	Lu01_5723512	1	5723512	0.3926	3.4768	4.2008	2.8398	0.4269
DL19-20	pLARmEB	Lu02_22847296	2	22847296	-0.4886	3.4381	4.1599	4.4113	0.3192
DL19-20	pLARmEB	Lu03_12371782	3	12371782	-0.6284	3.0194	3.7159	3.3218	0.4808
DL19-20	pLARmEB	Lu04_15178685	4	15178685	-1.3041	10.7893	11.7434	31.428	0.25
DL19-20	pLARmEB	Lu05_5724521	5	5724521	-0.4815	3.4735	4.1973	4.1176	0.3385
DL19-20	pLARmEB	Lu06_1027899	6	1027899	0.8184	5.7457	6.5699	12.2827	0.2269
DL19-20	pLARmEB	Lu06_17233382	6	17233382	-0.5448	3.8284	4.5713	5.4436	0.2962
DL19-20	pLARmEB	Lu12_3248052	12	3248052	-0.3669	3.0846	3.7852	1.7678	0.3462
DL19-20	pLARmEB	Lu12_3841469	12	3841469	-0.5501	3.3635	4.081	3.1485	0.4692
DL19-20	pLARmEB	Lu12_5344617	12	5344617	0.8074	8.4451	9.3483	11.0274	0.2308
DL19-20	ISIS EM-BLASSO	Lu02_4526841	2	4526841	0.5151	3.2243	3.9335	5.9027	0.2654
DL19-20	ISIS EM-BLASSO	Lu02_21781085	2	21781085	-1.1098	3.5718	4.301	27.4474	0.2692
DL19-20	ISIS EM-BLASSO	Lu02_22847296	2	22847296	-0.5069	3.473	4.1967	5.7324	0.3192
