# Supplementary material for: Genetic dissection of thousand-seed weight in linseed (Linum usitatissimum L.) using multi-locus genome-wide association study
Source: Front Plant Sci. 2023 Jun 2;14:1166728. doi: 10.3389/fpls.2023.1166728 (PMC10272591; doi:10.3389/fpls.2023.1166728)
Supplement: Supplementary file 5 [file Table_4.xlsx]

## Sheet: Sheet1
Supplementary Table 4: List of total potential candidate genes identified in 30 Kb upstream and 30 Kb downstream (total 60 Kb) regions of stable QTNs for TSW and their functional annotation
QTN	Lu Gene ID	Start	End	Strand	Best Uniprot hit	Gene name	Protein name	Subcellular location	Cross-reference (KEGG)	Function	Gene ontology (biological process)
Lu01_5723512	Lus10012572	5694907	5696754	+	FUS3_ARATH	FUS3 At3g26790 MDJ14.4	B3 domain-containing transcription factor FUS3 (Protein FUSCA3)	Nucleus {ECO:0000305}.	ath:AT3G26790	Transcription regulator involved in gene regulation during late embryogenesis. Its expression to the epidermis is sufficient to control foliar organ identity by regulating positively the synthesis abscisic acid (ABA) and negatively gibberellin production. Negatively regulates TTG1 in the embryo. Positively regulates the abundance of the ABI3 protein in the seed. Cooperates with KIN10 to regulate …	embryo development ending in seed dormancy [GO:0009793]; negative regulation of gibberellin biosynthetic process [GO:0010373]; plant organ development [GO:0099402]; positive regulation of abscisic acid-activated signaling pathway [GO:0009789]; positive regulation of abscisic acid biosynthetic process [GO:0010116]; positive regulation of cell population proliferation [GO:0008284]; regulation of em…
	Lus10012573	5697637	5698458	+	FUS3_ARATH	FUS3 At3g26790 MDJ14.4	B3 domain-containing transcription factor FUS3 (Protein FUSCA3)	Nucleus {ECO:0000305}.	ath:AT3G26790	Transcription regulator involved in gene regulation during late embryogenesis. Its expression to the epidermis is sufficient to control foliar organ identity by regulating positively the synthesis abscisic acid (ABA) and negatively gibberellin production. Negatively regulates TTG1 in the embryo. Positively regulates the abundance of the ABI3 protein in the seed. Cooperates with KIN10 to regulate …	embryo development ending in seed dormancy [GO:0009793]; negative regulation of gibberellin biosynthetic process [GO:0010373]; plant organ development [GO:0099402]; positive regulation of abscisic acid-activated signaling pathway [GO:0009789]; positive regulation of abscisic acid biosynthetic process [GO:0010116]; positive regulation of cell population proliferation [GO:0008284]; regulation of em…
	Lus10012574	5699182	5701893	-	MPCP3_ARATH	MPT3 AT5 PHT3;1 At5g14040 MUA22_4	Mitochondrial phosphate carrier protein 3, mitochondrial (Mitochondrial phosphate transporter 3) (MPT3) (Phosphate transporter 3;1)	Mitochondrion inner membrane {ECO:0000269|PubMed:14671022}; Multi-pass membrane protein {ECO:0000269|PubMed:14671022}.	ath:AT5G14040	Transport of phosphate groups from the cytosol to the mitochondrial matrix. Mediates salt stress tolerance through an ATP-dependent pathway and via modulation of the gibberellin metabolism. {ECO:0000269|PubMed:14756774, ECO:0000269|PubMed:22937061}.	mitochondrial phosphate ion transmembrane transport [GO:1990547]; phosphate ion transmembrane transport [GO:0035435]; response to salt stress [GO:0009651]
	Lus10012575	5704084	5705660	+	SDR2A_ARATH	SDR2a SDR2 At3g51680 T18N14.60	Short-chain dehydrogenase reductase 2a (AtSDR2a) (EC 1.1.1.-)		ath:AT3G51680
	Lus10012577	5708525	5716858	-	MANA2_ARATH	At5g13980 MAC12.5	Probable alpha-mannosidase At5g13980 (EC 3.2.1.24)		ath:AT5G13980	Liberates mannose from p-nitrophenyl-alpha-D-mannoside in vitro. {ECO:0000250|UniProtKB:P94078}.	mannose metabolic process [GO:0006013]
	Lus10012578	5718553	5726158	-	MANA1_ARATH	At3g26720 MLJ15.11	Alpha-mannosidase At3g26720 (EC 3.2.1.24)		ath:AT3G26720	Liberates mannose from p-nitrophenyl-alpha-D-mannoside in vitro. {ECO:0000269|PubMed:16233119}.	mannose metabolic process [GO:0006013]
	Lus10012579	5727130	5728417	-	MAK3_ARATH	MAK3 PAM21 At2g38130 F16M14.6	N-alpha-acetyltransferase MAK3 (EC 2.3.1.256) (N-acetyltransferase MAK3 homolog) (AtMAK3) (Protein PHOTOSYNTHESIS ALTERED MUTANT 21)	Cytoplasm {ECO:0000269|PubMed:12897255}.	ath:AT2G38130	Probably required for N-acetylation of some chloroplast precursor proteins and efficient accumulation of thylakoid multiprotein complexes. In yeast, can replace the NatC complex (composed of MAK3, MAK10 and MAK31) by acetylating N termini of endogenous proteins and the N-terminus Met of L-A virus Gag protein. However, the formation of a NatC complex is not required for this function. {ECO:0000269…	N-terminal peptidyl-methionine acetylation [GO:0017196]
	Lus10012580	5728837	5730355	+	UCRI_MAIZE		Cytochrome b-c1 complex subunit Rieske, mitochondrial (EC 7.1.1.8) (Complex III subunit 5) (Rieske iron-sulfur protein) (RISP) (Ubiquinol-cytochrome c reductase iron-sulfur subunit)	Mitochondrion inner membrane {ECO:0000250|UniProtKB:P08067}; Single-pass membrane protein {ECO:0000250|UniProtKB:P08067}.	zma:542550	Component of the ubiquinol-cytochrome c oxidoreductase, a multisubunit transmembrane complex that is part of the mitochondrial electron transport chain which drives oxidative phosphorylation. The respiratory chain contains 3 multisubunit complexes succinate dehydrogenase (complex II, CII), ubiquinol-cytochrome c oxidoreductase (cytochrome b-c1 complex, complex III, CIII) and cytochrome c oxidase …	aerobic respiration [GO:0009060]; mitochondrial electron transport, ubiquinol to cytochrome c [GO:0006122]; response to heat [GO:0009408]
	Lus10012581	5732437	5736390	+
	Lus10012582	5737504	5738913	-	C84A1_ARATH	CYP84A1 FAH1 At4g36220 F23E13.110	Cytochrome P450 84A1 (EC 1.14.-.-) (Ferulate-5-hydroxylase) (F5H)	Membrane {ECO:0000305}; Single-pass membrane protein {ECO:0000305}.	ath:AT4G36220		lignin biosynthetic process [GO:0009809]; phenylpropanoid biosynthetic process [GO:0009699]; response to UV-B [GO:0010224]
	Lus10012583	5741722	5742285	+	C84A1_ARATH	CYP84A1 FAH1 At4g36220 F23E13.110	Cytochrome P450 84A1 (EC 1.14.-.-) (Ferulate-5-hydroxylase) (F5H)	Membrane {ECO:0000305}; Single-pass membrane protein {ECO:0000305}.	ath:AT4G36220		lignin biosynthetic process [GO:0009809]; phenylpropanoid biosynthetic process [GO:0009699]; response to UV-B [GO:0010224]
	Lus10012584	5742895	5745525	+
	Lus10012585	5746308	5748406	-	PERK3_ARATH	PERK3 At3g24540 MOB24.4	Proline-rich receptor-like protein kinase PERK3 (EC 2.7.11.1) (Proline-rich extensin-like receptor kinase 3) (AtPERK3)	Cell membrane {ECO:0000250}; Single-pass membrane protein {ECO:0000250}.
Lu01_10099509	Lus10022687	10109656	10110577	-
	Lus10022688	10101395	10108691	-	ORLIK_ARATH	ORLIKE At5g06130	Protein ORANGE-LIKE, chloroplastic (DnaJ-like cysteine-rich domain-containing protein Or-like)	Plastid, chloroplast membrane {ECO:0000269|PubMed:25675505}.	ath:AT5G06130	May be associated with accumulation of carotenoids in chromoplasts. {ECO:0000305|PubMed:26224804}.	positive regulation of carotenoid biosynthetic process [GO:1904143]; protein stabilization [GO:0050821]
	Lus10022689	10100061	10100761	-
	Lus10022690	10099416	10099997	+	PUB13_ARATH	PUB13 At3g46510 F12A12.30	U-box domain-containing protein 13 (EC 2.3.2.27) (Plant U-box protein 13) (RING-type E3 ubiquitin transferase PUB13)	Nucleus {ECO:0000269|PubMed:18552232}. Cytoplasm {ECO:0000269|PubMed:18552232}.	ath:AT3G46510	Functions as an E3 ubiquitin ligase. {ECO:0000250}.	cell surface receptor signaling pathway [GO:0007166]; defense response to bacterium [GO:0042742]; negative regulation of apoptotic process [GO:0043066]; negative regulation of immune response [GO:0050777]; protein ubiquitination [GO:0016567]; regulation of photoperiodism, flowering [GO:2000028]
	Lus10022691	10097829	10099359	-
	Lus10022692	10094894	10095586	-	AB1I_ARATH	ABCI1 CCMA NAP10 At1g63270 F9N12.11	ABC transporter I family member 1 (ABC transporter ABCI.1) (AtABCI1) (Cytochrome c biogenesis ATP-binding export protein ccmA-like) (MRP-related protein 3) (Putative non-intrinsic ABC protein 10) (EC 7.6.2.5)	Membrane {ECO:0000250}; Peripheral membrane protein {ECO:0000250}.	ath:AT1G63270	Part of the ABC transporter complex CcmAB involved in the biogenesis of c-type cytochromes; once thought to export heme, this seems not to be the case, but its exact role is uncertain. Responsible for energy coupling to the transport system (By similarity). {ECO:0000250}.	cytochrome complex assembly [GO:0017004]
	Lus10022693	10092038	10093716	-	RS142_ARATH	RPS14B At3g11510 F24K9.19	40S ribosomal protein S14-2	Cytoplasm.	ath:AT3G11510		maturation of SSU-rRNA from tricistronic rRNA transcript (SSU-rRNA, 5.8S rRNA, LSU-rRNA) [GO:0000462]; ribosomal small subunit assembly [GO:0000028]; translation [GO:0006412]
	Lus10022694	10085986	10089219	+	KN5C_TOBAC	KIN5C TKRP125	Kinesin-like protein KIN-5C (125 kDa kinesin-related protein)	Cytoplasm {ECO:0000269|PubMed:9044048}. Cytoplasm, cytoskeleton {ECO:0000269|PubMed:9044048}. Cytoplasm, cytoskeleton, spindle {ECO:0000269|PubMed:9044048}. Note=Microtubule-associated. {ECO:0000269|PubMed:9044048}.	nta:107774014	Responsible for microtubule translocation. May be important for the organization of phragmoplast-specific arrays of microtubules (PubMed:7983184). Plays an essential role in stabilizing the mitotic spindle. Required during mitotic cytokinesis (By similarity). {ECO:0000250|UniProtKB:F4IIS5, ECO:0000269|PubMed:7983184}.	microtubule-based movement [GO:0007018]
	Lus10022695	10082774	10085054	-	RL40_NICSY	UBICEP52-7 RPL40	Ubiquitin-60S ribosomal protein L40 [Cleaved into: Ubiquitin; 60S ribosomal protein L40 (CEP52)]	[Ubiquitin]: Cytoplasm {ECO:0000250}. Nucleus {ECO:0000250}.; [60S ribosomal protein L40]: Cytoplasm {ECO:0000250}.		[Ubiquitin]: Exists either covalently attached to another protein, or free (unanchored). When covalently bound, it is conjugated to target proteins via an isopeptide bond either as a monomer (monoubiquitin), a polymer linked via different Lys residues of the ubiquitin (polyubiquitin chains) or a linear polymer linked via the initiator Met of the ubiquitin (linear polyubiquitin chains). Polyubiqui…	translation [GO:0006412]
	Lus10022696	10080928	10081470	+	INV1_DAUCA	INV1	Beta-fructofuranosidase, insoluble isoenzyme 1 (EC 3.2.1.26) (Cell wall beta-fructosidase 1) (Invertase 1) (Sucrose hydrolase 1)	Secreted, cell wall. Note=Ionically bound to the cell wall.		May play an important role in phloem unloading and in stress response.	carbohydrate metabolic process [GO:0005975]
	Lus10022697	10074849	10079898	+	KN5C_TOBAC	KIN5C TKRP125	Kinesin-like protein KIN-5C (125 kDa kinesin-related protein)	Cytoplasm {ECO:0000269|PubMed:9044048}. Cytoplasm, cytoskeleton {ECO:0000269|PubMed:9044048}. Cytoplasm, cytoskeleton, spindle {ECO:0000269|PubMed:9044048}. Note=Microtubule-associated. {ECO:0000269|PubMed:9044048}.	nta:107774014	Responsible for microtubule translocation. May be important for the organization of phragmoplast-specific arrays of microtubules (PubMed:7983184). Plays an essential role in stabilizing the mitotic spindle. Required during mitotic cytokinesis (By similarity). {ECO:0000250|UniProtKB:F4IIS5, ECO:0000269|PubMed:7983184}.	microtubule-based movement [GO:0007018]
	Lus10022698	10070832	10072942	-
Lu02_4526841	Lus10020230	4503361	4507214	+	U2A2A_NICPL	U2AF65A	Splicing factor U2af large subunit A (NpU2AF65a) (U2 auxiliary factor 65 kDa subunit A) (U2 small nuclear ribonucleoprotein auxiliary factor large subunit A) (U2 snRNP auxiliary factor large subunit A)	Nucleus {ECO:0000269|PubMed:9852132}.		Necessary for the splicing of pre-mRNA. Binds to the U -enriched regions of plant introns. {ECO:0000269|PubMed:9852132}.	mRNA processing [GO:0006397]; RNA splicing [GO:0008380]
	Lus10020231	4508131	4510679	+	TIPRL_ARATH	TIP41L At4g34270 F10M10.40	TIP41-like protein		ath:AT4G34270	May be involved in the regulation of the TOR signaling pathway. Indirectly activates the PP2A phosphatase via interaction with its suppressor TAP46. Could play a role in cytoskeleton functions. {ECO:0000250|UniProtKB:Q12199}.	regulation of phosphoprotein phosphatase activity [GO:0043666]; TOR signaling [GO:0031929]
	Lus10020232	4518720	4522702	+	BGL42_ARATH	BGLU42 At5g36890 MLF18.1	Beta-glucosidase 42 (AtBGLU42) (EC 3.2.1.21)		ath:AT5G36890	Involved in the secretion of root-derived phenolics upon iron ions (Fe) depletion. Promotes disease resistance toward B.cinerea, H.arabidopsidis and P.syringae pv. tomato DC3000. Required during rhizobacteria-mediated (e.g. P.fluorescens WCS417r) broad-spectrum induced systemic resistance (ISR) against several pathogens. {ECO:0000269|PubMed:25138267}.	cellulose catabolic process [GO:0030245]; induced systemic resistance, ethylene mediated signaling pathway [GO:0009866]; positive regulation of defense response [GO:0031349]; response to bacterium [GO:0009617]; response to iron ion starvation [GO:1990641]; secondary metabolic process [GO:0019748]
	Lus10020233	4528243	4533336	-	SSC14_ARATH	SYN4 At5g16270 T21H19.190	Sister chromatid cohesion 1 protein 4 (AtRAD21-3) (AtRAD21.3)	Nucleus {ECO:0000250}. Chromosome, centromere {ECO:0000305}.	ath:AT5G16270	Involved in sister chromatid and centromere cohesion during mitosis. {ECO:0000269|PubMed:16488915, ECO:0000269|PubMed:19533160}.	cell division [GO:0051301]; centromeric sister chromatid cohesion [GO:0070601]; double-strand break repair [GO:0006302]; mitotic sister chromatid cohesion [GO:0007064]; replication-born double-strand break repair via sister chromatid exchange [GO:1990414]; sister chromatid cohesion [GO:0007062]; synaptonemal complex assembly [GO:0007130]
	Lus10020234	4533525	4534288	+	BGL42_ARATH	BGLU42 At5g36890 MLF18.1	Beta-glucosidase 42 (AtBGLU42) (EC 3.2.1.21)		ath:AT5G36890	Involved in the secretion of root-derived phenolics upon iron ions (Fe) depletion. Promotes disease resistance toward B.cinerea, H.arabidopsidis and P.syringae pv. tomato DC3000. Required during rhizobacteria-mediated (e.g. P.fluorescens WCS417r) broad-spectrum induced systemic resistance (ISR) against several pathogens. {ECO:0000269|PubMed:25138267}.	cellulose catabolic process [GO:0030245]; induced systemic resistance, ethylene mediated signaling pathway [GO:0009866]; positive regulation of defense response [GO:0031349]; response to bacterium [GO:0009617]; response to iron ion starvation [GO:1990641]; secondary metabolic process [GO:0019748]
	Lus10020235	4539809	4547621	-	SSC14_ARATH	SYN4 At5g16270 T21H19.190	Sister chromatid cohesion 1 protein 4 (AtRAD21-3) (AtRAD21.3)	Nucleus {ECO:0000250}. Chromosome, centromere {ECO:0000305}.	ath:AT5G16270	Involved in sister chromatid and centromere cohesion during mitosis. {ECO:0000269|PubMed:16488915, ECO:0000269|PubMed:19533160}.	cell division [GO:0051301]; centromeric sister chromatid cohesion [GO:0070601]; double-strand break repair [GO:0006302]; mitotic sister chromatid cohesion [GO:0007064]; replication-born double-strand break repair via sister chromatid exchange [GO:1990414]; sister chromatid cohesion [GO:0007062]; synaptonemal complex assembly [GO:0007130]
Lu02_22847296	Lus10030683	22816297	22817837	+	AVT1J_ARATH	AVT1J At5g15240 F8M21.130	Amino acid transporter AVT1J (AtAvt1J)	Membrane {ECO:0000255}; Multi-pass membrane protein {ECO:0000255}.	ath:AT5G15240		amino acid transport [GO:0006865]
	Lus10030684	22818274	22821792	+	GDL64_ARATH	At4g16230 dl4155w FCAALL.318	GDSL esterase/lipase At4g16230 (EC 3.1.1.-) (Extracellular lipase At4g16230)	Secreted {ECO:0000305}.	ath:AT4G16230		lipid catabolic process [GO:0016042]
	Lus10030685	22822609	22825057	-	AAR3_ARATH	AAR3 At3g28970 K5K13.8	Defective in cullin neddylation protein AAR3 (Protein ANTIAUXIN-RESISTANT 3)	Nucleus {ECO:0000255|PROSITE-ProRule:PRU00768, ECO:0000269|PubMed:17905859}.	ath:AT3G28970	May contribute to the neddylation of all cullins by transferring NEDD8 from N-terminally acetylated NEDD8-conjugating E2s enzyme to different cullin C-terminal domain-RBX complexes; neddylation of cullins play an essential role in the regulation of SCF-type complexes activity (By similarity). Regulates responses to the synthetic auxin 2,4-dichlorophenoxyacetic acid (2,4-D) in roots, probably by m…	auxin-activated signaling pathway [GO:0009734]; positive regulation of ubiquitin-protein transferase activity [GO:0051443]; protein neddylation [GO:0045116]
	Lus10030686	22827374	22827997	-	Y5902_ARATH	At5g19025 T16G12_60	Uncharacterized protein At5g19025	Membrane {ECO:0000305}; Multi-pass membrane protein {ECO:0000305}.	ath:AT5G19025
	Lus10030687	22831581	22832483	-	C93A1_SOYBN	CYP93A1 Glyma03g29950	3,9-dihydroxypterocarpan 6A-monooxygenase (EC 1.14.14.93) (Cytochrome P450 93A1) (Dihydroxypterocarpan 6a-hydroxylase) (D6aH)	Membrane {ECO:0000305}.	gmx:100776878	Cytochrome P450 involved in the biosynthesis of the phytoalexin glyceollin. Stereospecific for (6aR,11aR)-3,9-dihydroxypterocarpan. {ECO:0000269|PubMed:9720921}.	defense response [GO:0006952]
	Lus10030688	22833913	22836962	-	PTBP1_ARATH	PTB At3g01150 T4P13.16	Polypyrimidine tract-binding protein homolog 1	Nucleus {ECO:0000305}.	ath:AT3G01150	Plays a role in pre-mRNA splicing. Binds to the polypyrimidine tract of introns. May promote the binding of U2 snRNP to pre-mRNA (By similarity). {ECO:0000250}.	mRNA processing [GO:0006397]; regulation of alternative mRNA splicing, via spliceosome [GO:0000381]; regulation of RNA splicing [GO:0043484]; regulation of translation [GO:0006417]; RNA splicing [GO:0008380]; seed germination [GO:0009845]
	Lus10030689	22841182	22843859	+	Y4837_ARATH	At4g18375 F28J12.2	KH domain-containing protein At4g18375	Nucleus {ECO:0000305}.	ath:AT4G18375		regulation of gene expression [GO:0010468]
	Lus10030690	22847076	22848397	+	LAML_ARATH	At5g15350 F8M21_240	Lamin-like protein	Cell membrane; Lipid-anchor, GPI-anchor.	ath:AT5G15350
	Lus10030691	22849669	22850282	-
	Lus10030692	22853714	22857117	+	CDC2C_ARATH	CDC2C CKL1 At5g39420 MUL8.100	Cyclin-dependent kinase C-2 C (CDC2CAt) (Protein cdc2 C) (EC 2.7.11.-) (Cyclin-dependent kinase-like protein 1) (CDK-like protein 1)	Nucleus {ECO:0000255|PROSITE-ProRule:PRU00768}.	ath:AT5G39420		phosphorylation of RNA polymerase II C-terminal domain [GO:0070816]; positive regulation of transcription elongation from RNA polymerase II promoter [GO:0032968]; protein phosphorylation [GO:0006468]
	Lus10030693	22860122	22861317	+	P24D9_ARATH	At1g26690 T24P13.7	Transmembrane emp24 domain-containing protein p24delta9 (p24 family protein delta2c) (p24delta2c) (p24 family protein delta9) (p24delta9)	Endoplasmic reticulum membrane {ECO:0000269|PubMed:22132757}; Single-pass type I membrane protein {ECO:0000269|PubMed:22132757}. Golgi apparatus, cis-Golgi network membrane {ECO:0000269|PubMed:22132757}; Single-pass type I membrane protein {ECO:0000269|PubMed:22132757}. Golgi apparatus, Golgi stack membrane {ECO:0000269|PubMed:22132757}; Single-pass type I membrane protein {ECO:0000269|PubMed:221…	ath:AT1G26690	Involved in vesicular protein trafficking. Mainly functions in the early secretory pathway. Thought to act as cargo receptor at the lumenal side for incorporation of secretory cargo molecules into transport vesicles and to be involved in vesicle coat formation at the cytoplasmic side (By similarity). {ECO:0000250}.	endoplasmic reticulum to Golgi vesicle-mediated transport [GO:0006888]; Golgi organization [GO:0007030]; intracellular protein transport [GO:0006886]
	Lus10030694	22863160	22865975	-	CGS1_ARATH	CGS1 CYS1 MTO1 At3g01120 T4P13.19	Cystathionine gamma-synthase 1, chloroplastic (AtCGS1) (EC 2.5.1.48) (METHIONINE OVERACCUMULATION 1) (O-succinylhomoserine (thiol)-lyase)	Plastid, chloroplast {ECO:0000269|PubMed:25146485}.	ath:AT3G01120	Catalyzes the first committed step of methionine (Met) biosynthesis. Catalyzes the formation of L-cystathionine from homoserine esters and L-cysteine, via a gamma-replacement reaction. Substrate preference for cystathionine synthesis is O-phospho-L-homoserine (OPH) > O(4)-succinyl-L-homoserine (OSH) >> O-acetyl-L-homoserine (OAH). Is able, at extremely low rate, to catalyze a gamma-elimination of…	methionine biosynthetic process [GO:0009086]; selenium compound metabolic process [GO:0001887]; transsulfuration [GO:0019346]
	Lus10030695	22868535	22869024	+
	Lus10030696	22869060	22869395	+
	Lus10030697	22871545	22876219	-	UBE4_ARATH	PUB1 UFD2 At5g15400 T20K14_10	Probable ubiquitin conjugation factor E4 (EC 2.3.2.27) (Plant U-box protein 1) (RING-type E3 ubiquitin transferase E4) (U-box domain-containing protein 1) (Ubiquitin-fusion degradation protein 2-like) (UB fusion protein 2-like)	Cytoplasm {ECO:0000250|UniProtKB:P54860}. Nucleus {ECO:0000250|UniProtKB:P54860}.	ath:AT5G15400	Ubiquitin-protein ligase that may function as an E3 ligase in conjunction with specific E1 and E2 ligases. May also function as an E4 ligase mediating the assembly of polyubiquitin chain assembly on substrates monoubiquitinated by another E3 ubiquitin ligase. {ECO:0000250|UniProtKB:P54860, ECO:0000250|UniProtKB:Q9ES00}.	protein polyubiquitination [GO:0000209]; protein ubiquitination [GO:0016567]; ubiquitin-dependent ERAD pathway [GO:0030433]; ubiquitin-dependent protein catabolic process [GO:0006511]
Lu03_12371782	Lus10015956	12369965	12372631	+	ACR4L_ARATH	ACR4 At3g59420 F25L23.280	Serine/threonine-protein kinase-like protein ACR4 (EC 2.7.11.1) (Protein CRINKLY 4) (AtCR4)	Cell membrane; Single-pass type I membrane protein. Endosome, multivesicular body membrane; Single-pass type I membrane protein. Note=Also localized into protein export bodies. Internalization may be involved in degradation of ACR4 for its rapid turn-over. In the epidermis, mostly expressed in the lateral and basal planes of cells.	ath:AT3G59420	Controls formative cell division in meristems, including root tips and lateral root initiation zones of the pericycle, in response to CLE40 signal. Acts with CLE40p peptide as a ligand-receptor pair in a signal transduction pathway, coordinating movement of the root tip and organization of cell divisions in the root meristem. Required during embryogenesis and development, probably for the differe…	embryo development ending in seed dormancy [GO:0009793]; flower morphogenesis [GO:0048439]; lateral root formation [GO:0010311]; plant epidermal cell differentiation [GO:0090627]; protein autophosphorylation [GO:0046777]; regulation of asymmetric cell division [GO:0009786]; root cap development [GO:0048829]; root development [GO:0048364]
Lu03_19423426	Lus10033906	19413093	19413736	-	RPN2_ARATH	RPN2 HAP6 At4g21150 F7J7.90	Dolichyl-diphosphooligosaccharide--protein glycosyltransferase subunit 2 (Protein HAPLESS 6) (Ribophorin II) (RPN-II) (Ribophorin-2)	Endoplasmic reticulum membrane {ECO:0000250}; Multi-pass membrane protein {ECO:0000250}.	ath:AT4G21150	Subunit of the oligosaccharyl transferase (OST) complex that catalyzes the initial transfer of a defined glycan (Glc(3)Man(9)GlcNAc(2) in eukaryotes) from the lipid carrier dolichol-pyrophosphate to an asparagine residue within an Asn-X-Ser/Thr consensus motif in nascent polypeptide chains, the first step in protein N-glycosylation. N-glycosylation occurs cotranslationally and the complex associa…	protein N-linked glycosylation [GO:0006487]; response to cold [GO:0009409]
	Lus10033907	19415719	19416802	-	NOP10_ARATH	At2g20490 T13C7.8	H/ACA ribonucleoprotein complex subunit 3-like protein (Nucleolar protein 10)	Nucleus, nucleolus {ECO:0000250}.	ath:AT2G20490	Required for ribosome biogenesis. Part of a complex which catalyzes pseudouridylation of rRNA. This involves the isomerization of uridine such that the ribose is subsequently attached to C5, instead of the normal N1. Pseudouridine ('psi') residues may serve to stabilize the conformation of rRNAs (By similarity). {ECO:0000250}.	polar nucleus fusion [GO:0010197]; rRNA pseudouridine synthesis [GO:0031118]; snRNA pseudouridine synthesis [GO:0031120]
	Lus10033908	19417200	19418392	+	Y1390_ARATH	At1g03900 F21M11.17	Uncharacterized protein At1g03900		ath:AT1G03900		endocytosis [GO:0006897]; vesicle-mediated transport [GO:0016192]
	Lus10033909	19419118	19423820	-	CHR8_ARATH	CHR8 CSB ERCC6 RAD26 RAD54 At2g18760 MSF3.14	Protein CHROMATIN REMODELING 8 (AtCHR8) (AtCSB) (EC 3.6.4.-)	Nucleus {ECO:0000250|UniProtKB:Q03468, ECO:0000255|PROSITE-ProRule:PRU00768}.	ath:AT2G18760	Essential factor involved in transcription-coupled nucleotide excision repair (TCR) which allows RNA polymerase II-blocking lesions to be rapidly removed from the transcribed strand of active genes. Upon DNA-binding, it locally modifies DNA conformation by wrapping the DNA around itself, thereby modifying the interface between stalled RNA polymerase II and DNA. It is required for transcription-co…	cellular response to DNA damage stimulus [GO:0006974]; DNA repair [GO:0006281]; response to gamma radiation [GO:0010332]; transcription-coupled nucleotide-excision repair [GO:0006283]
	Lus10033910	19435428	19438009	+
	Lus10033911	19442392	19447831	+	IRE3_ARATH	IRE3 At1g48490 T1N15.10	Probable serine/threonine protein kinase IRE3 (AtIRE3) (EC 2.7.11.1)		ath:AT1G48490		intracellular signal transduction [GO:0035556]; peptidyl-serine phosphorylation [GO:0018105]
	Lus10033912	19452197	19453825	+	SCR_ARATH	SCR SGR1 At3g54220 F24B22.180	Protein SCARECROW (AtSCR) (GRAS family protein 20) (AtGRAS-20) (Protein SHOOT GRAVITROPISM 1)	Nucleus.	ath:AT3G54220	Transcription factor required for quiescent center cells specification and maintenance of surrounding stem cells, and for the asymmetric cell division involved in radial pattern formation in roots. Essential for cell division but not differentiation of the ground tissue. Also required for normal shoot gravitropism. Regulates the radial organization of the shoot axial organs. Binds to the promoter…	asymmetric cell division [GO:0008356]; bundle sheath cell fate specification [GO:0090610]; gravitropism [GO:0009630]; leaf development [GO:0048366]; maintenance of protein location in nucleus [GO:0051457]; radial pattern formation [GO:0009956]; regulation of transcription, DNA-templated [GO:0006355]; root development [GO:0048364]
Lu03_25720369	Lus10037487	25750341	25751195	+	RAP23_ARATH	RAP2-3 EBP ERF072 At3g16770 MGL6.1 MGL6.24	Ethylene-responsive transcription factor RAP2-3 (Cadmium-induced protein AS30) (Ethylene response factor 72) (ERF72) (Ethylene-responsive element binding protein) (AtEBP) (Protein RELATED TO APETALA2 3) (Related to AP2 3)	Nucleus. Cytoplasm. Cell membrane.	ath:AT3G16770	Probably acts as a transcriptional activator. Binds to the GCC-box pathogenesis-related promoter element. May be involved in the regulation of gene expression by stress factors and by components of stress signal transduction pathways (By similarity). {ECO:0000250, ECO:0000269|PubMed:9159183}.	cell death [GO:0008219]; ethylene-activated signaling pathway [GO:0009873]; heat acclimation [GO:0010286]; positive regulation of transcription, DNA-templated [GO:0045893]; response to cytokinin [GO:0009735]; response to ethylene [GO:0009723]; response to jasmonic acid [GO:0009753]; response to other organism [GO:0051707]
	Lus10037488	25746079	25747123	+	MORF3_ARATH	MORF3 RIP3 At3g06790 F3E22.7	Multiple organellar RNA editing factor 3, mitochondrial (RNA editing-interacting protein 3)	Mitochondrion {ECO:0000269|PubMed:25583991}.	ath:AT3G06790	Involved in organellar RNA editing. Required for the processing of RNA editing sites in mitochondria. {ECO:0000269|PubMed:22411807, ECO:0000269|PubMed:23818871}.	cytidine to uridine editing [GO:0016554]; mitochondrial mRNA modification [GO:0080156]; mitochondrial RNA modification [GO:1900864]; mRNA processing [GO:0006397]
	Lus10037489	25743130	25744911	-	PME58_ARATH	PME58 ARATH58 At5g49180 K21P3.5	Probable pectinesterase/pectinesterase inhibitor 58 [Includes: Pectinesterase inhibitor 58 (Pectin methylesterase inhibitor 58); Pectinesterase 58 (PE 58) (EC 3.1.1.11) (Pectin methylesterase 58) (AtPME58)]	Secreted, cell wall {ECO:0000250}.	ath:AT5G49180	Acts in the modification of cell walls via demethylesterification of cell wall pectin. {ECO:0000250}.	cell wall modification [GO:0042545]; mucilage metabolic process involved in seed coat development [GO:0048359]; mucilage pectin biosynthetic process [GO:0048358]; pectin catabolic process [GO:0045490]
	Lus10037490	25740195	25742300	+	ATL2_ARATH	ATL2 At3g16720 MGL6.19	RING-H2 finger protein ATL2 (EC 2.3.2.27) (Protein ARABIDOPSIS TOXICOS EN LEVADURA 2) (Protein ATL2) (RING-type E3 ubiquitin transferase ATL2)	Membrane {ECO:0000305}; Single-pass membrane protein {ECO:0000305}.	ath:AT3G16720	May be involved in the early steps of the plant defense signaling pathway.	defense response [GO:0006952]; protein ubiquitination [GO:0016567]
	Lus10037491	25739224	25739909	-	PLAT2_ARATH	PLAT2 At2g22170	PLAT domain-containing protein 2 (AtPLAT2) (PLAT domain protein 2)	Endoplasmic reticulum {ECO:0000250|UniProtKB:O65660}.	ath:AT2G22170	Involved in response to abiotic stress. {ECO:0000250|UniProtKB:O65660}.
	Lus10037492	25736261	25738979	+	ODB2_ARATH	BCE2 DIN3 LTA1 At3g06850 F3E22.1	Lipoamide acyltransferase component of branched-chain alpha-keto acid dehydrogenase complex, mitochondrial (EC 2.3.1.168) (Branched-chain alpha-keto acid dehydrogenase complex component E2) (BCE2) (BCKAD-E2) (BCKADE2) (Dihydrolipoamide acetyltransferase component of branched-chain alpha-keto acid dehydrogenase complex) (Dihydrolipoamide branched chain transacylase) (Dihydrolipoyllysine-residue (2…	Mitochondrion matrix {ECO:0000269|PubMed:14671022, ECO:0000269|PubMed:14764908}.	ath:AT3G06850	The branched-chain alpha-keto dehydrogenase complex catalyzes the overall conversion of alpha-keto acids to acyl-CoA and CO(2). It contains multiple copies of three enzymatic components: branched-chain alpha-keto acid decarboxylase (E1), lipoamide acyltransferase (E2) and lipoamide dehydrogenase (E3). Within this complex, the catalytic function of this enzyme is to accept, and to transfer to coen…	cellular response to sucrose starvation [GO:0043617]; fatty acid biosynthetic process [GO:0006633]; response to absence of light [GO:0009646]; response to sucrose [GO:0009744]
	Lus10037493	25734029	25734617	-	FLZ15_ARATH	FLZ15 DUF581-17 At5g49120 K20J1.9	FCS-Like Zinc finger 15	Cytoplasm, P-body {ECO:0000269|PubMed:29945970}.	ath:AT5G49120	May act as an adapter to facilitate the interaction of SnRK1 complex with effector proteins, conferring tissue- and stimulus-type specific differences in the SnRK1 regulation pathway. {ECO:0000269|PubMed:24600465}.
	Lus10037494	25730179	25730570	+	DYL1_CHLRE		Dynein 8 kDa light chain, flagellar outer arm	Cytoplasm, cytoskeleton, flagellum axoneme.	cre:CHLREDRAFT_194837		microtubule-based process [GO:0007017]; motile cilium assembly [GO:0044458]
	Lus10037495	25722563	25726927	-	MFPA_BRANA		Glyoxysomal fatty acid beta-oxidation multifunctional protein MFP-a [Includes: Enoyl-CoA hydratase/3-2-trans-enoyl-CoA isomerase/3-hydroxybutyryl-CoA epimerase (EC 4.2.1.17) (EC 5.1.2.3) (EC 5.3.3.8); 3-hydroxyacyl-CoA dehydrogenase (EC 1.1.1.35)]	Glyoxysome {ECO:0000250}.	bna:106389027		fatty acid beta-oxidation [GO:0006635]
	Lus10037496	25719179	25720519	-
	Lus10037497	25716318	25716712	+	LEA5D_GOSHI	LEA5-D	Late embryogenesis abundant protein Lea5-D		ghi:107916177
	Lus10037498	25715046	25715519	+	RL222_ARATH	RPL22B At3g05560 F18C1.17	60S ribosomal protein L22-2		ath:AT3G05560		cytoplasmic translation [GO:0002181]
	Lus10037499	25712650	25714245	+	UXS2_ARATH	UXS2 AUD1 D18 At3g62830 F26K9_260	UDP-glucuronic acid decarboxylase 2 (EC 4.1.1.35) (UDP-XYL synthase 2) (UDP-glucuronate decarboxylase 2) (UGD) (UXS-2) (dTDP-glucose 4-6-dehydratase homolog D18)	Golgi apparatus, Golgi stack membrane {ECO:0000269|PubMed:15655675}; Single-pass type II membrane protein {ECO:0000269|PubMed:15655675}.	ath:AT3G62830	Catalyzes the NAD-dependent decarboxylation of UDP-glucuronic acid to UDP-xylose. Necessary for the biosynthesis of the core tetrasaccharide in glycosaminoglycan biosynthesis. {ECO:0000269|PubMed:12481102, ECO:0000269|PubMed:15655675}.	dTDP-rhamnose biosynthetic process [GO:0019305]; D-xylose metabolic process [GO:0042732]; UDP-D-xylose biosynthetic process [GO:0033320]
	Lus10037500	25707948	25711368	+	PRL1_ARATH	PRL1 MAC2 At4g15900 dl3990w FCAALL.40	Protein pleiotropic regulatory locus 1 (Protein PRL1) (MOS4-associated complex protein 2) (MAC protein 2)	Nucleus {ECO:0000269|PubMed:9765207}.	ath:AT4G15900	Pleiotropic regulator of glucose, stress and hormone responses. Also regulates cytochrome P450 CYP90A1/CPD. Coordinates the expression of hormone- and stress-related genes and genes related to cell wall modification and growth, leading to altered sugar-dependent growth and developmental responses. Component of the MAC complex that probably regulates defense responses through transcriptional contr…	cotyledon development [GO:0048825]; defense response to bacterium [GO:0042742]; defense response to fungus [GO:0050832]; fruit development [GO:0010154]; hormone-mediated signaling pathway [GO:0009755]; innate immune response [GO:0045087]; innate immune response-activating signal transduction [GO:0002758]; leaf development [GO:0048366]; mRNA splicing, via spliceosome [GO:0000398]; negative regulat…
	Lus10037501	25705641	25706072	-
	Lus10037502	25703286	25704329	+	DNJ49_ARATH	ATJ49 C49 At5g49060 K19E20.16 K20J1_3	Chaperone protein dnaJ 49 (AtDjC49) (AtJ49)	Membrane {ECO:0000305}; Single-pass membrane protein {ECO:0000305}.	ath:AT5G49060	Plays a continuous role in plant development probably in the structural organization of compartments. {ECO:0000250}.	cellular response to misfolded protein [GO:0071218]; chaperone cofactor-dependent protein refolding [GO:0051085]; ubiquitin-dependent ERAD pathway [GO:0030433]
	Lus10037503	25699885	25702036	+	SNF4_ARATH	SNF4 CBSCBS3 At1g09020 F7G19.11	Sucrose nonfermenting 4-like protein (SNF4) (CBS domain-containing protein CBSCBS3) (SNF1-related protein kinase regulatory subunit betagamma) (AKIN subunit betagamma) (AKINbetagamma)	Nucleus {ECO:0000269|PubMed:17028154, ECO:0000269|PubMed:21235649}. Cytoplasm {ECO:0000269|PubMed:17028154, ECO:0000269|PubMed:21235649}.	ath:AT1G09020	Regulatory subunit of the probable trimeric SNF1-related protein kinase (SnRK) complex, which may play a role in a signal transduction cascade regulating gene expression and carbohydrate metabolism in higher plants.	carbohydrate metabolic process [GO:0005975]; cellular response to glucose starvation [GO:0042149]; mitochondrial fission [GO:0000266]; peroxisome fission [GO:0016559]; pollen hydration [GO:0009859]; protein autophosphorylation [GO:0046777]; protein phosphorylation [GO:0006468]; regulation of catalytic activity [GO:0050790]; regulation of protein kinase activity [GO:0045859]; regulation of reactiv…
	Lus10037504	25692857	25694472	+	SNF4_ARATH	SNF4 CBSCBS3 At1g09020 F7G19.11	Sucrose nonfermenting 4-like protein (SNF4) (CBS domain-containing protein CBSCBS3) (SNF1-related protein kinase regulatory subunit betagamma) (AKIN subunit betagamma) (AKINbetagamma)	Nucleus {ECO:0000269|PubMed:17028154, ECO:0000269|PubMed:21235649}. Cytoplasm {ECO:0000269|PubMed:17028154, ECO:0000269|PubMed:21235649}.	ath:AT1G09020	Regulatory subunit of the probable trimeric SNF1-related protein kinase (SnRK) complex, which may play a role in a signal transduction cascade regulating gene expression and carbohydrate metabolism in higher plants.	carbohydrate metabolic process [GO:0005975]; cellular response to glucose starvation [GO:0042149]; mitochondrial fission [GO:0000266]; peroxisome fission [GO:0016559]; pollen hydration [GO:0009859]; protein autophosphorylation [GO:0046777]; protein phosphorylation [GO:0006468]; regulation of catalytic activity [GO:0050790]; regulation of protein kinase activity [GO:0045859]; regulation of reactiv…
	Lus10037505	25690140	25691618	+	PP313_ARATH	PCMP-H1 At4g15720 dl3900w FCAALL.369	Pentatricopeptide repeat-containing protein At4g15720		ath:AT4G15720
Lu04_15178685	Lus10041631	15151161	15151445	+
	Lus10041632	15152029	15153021	-	CXE17_ARATH	CXE17 At5g16080 F1N13.220	Probable carboxylesterase 17 (AtCXE17) (EC 3.1.1.1)		ath:AT5G16080	Carboxylesterase acting on esters with varying acyl chain length. {ECO:0000250}.
	Lus10041633	15154071	15154998	-
	Lus10041634	15159038	15160874	+	WTR38_ARATH	At5g07050 MOJ9.22	WAT1-related protein At5g07050	Membrane {ECO:0000250}; Multi-pass membrane protein {ECO:0000305}.	ath:AT5G07050
	Lus10041635	15162981	15167697	-	MA655_ARATH	MAP65-5 At2g38720 T6A23.8	65-kDa microtubule-associated protein 5 (AtMAP65-5)	Nucleus. Cytoplasm {ECO:0000250}. Cytoplasm, cytoskeleton, spindle. Cytoplasm, cytoskeleton, phragmoplast. Cytoplasm, cell cortex. Cell junction, plasmodesma. Note=Present in MT cortical arrays. Binds the preprophase band and the prophase spindle microtubule during prophase. Binds MT during anaphase. Associates also with phragmoplast; binds MT of young emerging phragmoplasts but don't binds along…	ath:AT2G38720	Microtubule-associated protein that bundle and stabilize adjacent microtubules (MT) of the cell cortex. Confers MT resistance to the drug oryzalin. Promotes the formation of a planar network of antiparallel microtubules. {ECO:0000269|PubMed:15557096, ECO:0000269|PubMed:18667529}.	cell cycle [GO:0007049]; cell division [GO:0051301]; microtubule cytoskeleton organization [GO:0000226]
	Lus10041637	15175315	15177470	+	C7254_GLYUR	CYP72A154	11-oxo-beta-amyrin 30-oxidase (EC 1.14.14.115) (Cytochrome P450 72A154)	Membrane {ECO:0000305}; Single-pass membrane protein {ECO:0000305}.	ag:BAL45207	Involved in the biosynthesis of Glycyrrhetinic acid (GA), a natural product which exhibits anti-inflammatory activity (PubMed:31138208). Involved in the biosynthesis of the triterpenoid saponin glycyrrhizin (PubMed:22128119). Catalyzes three sequential oxidation steps at C-30 of 11-oxo-beta-amyrin (PubMed:22128119). Also able to catalyze C-30 monohydroxylation of beta-amyrin to produce 30-hydroxy…	11-oxo-beta-amyrin catabolic process [GO:1902382]; glycyrrhetinate biosynthetic process [GO:1902386]
	Lus10041638	15178439	15179728	-	NFYC3_ARATH	NFYC3 At1g54830 F14C21.41 T22H22.22	Nuclear transcription factor Y subunit C-3 (AtNF-YC-3)	Nucleus {ECO:0000250}.	ath:AT1G54830	Stimulates the transcription of various genes by recognizing and binding to a CCAAT motif in promoters. {ECO:0000250}.	abscisic acid-activated signaling pathway [GO:0009738]; gibberellic acid mediated signaling pathway [GO:0009740]; long-day photoperiodism, flowering [GO:0048574]; positive regulation of photomorphogenesis [GO:2000306]; regulation of seed germination [GO:0010029]; regulation of transcription, DNA-templated [GO:0006355]
	Lus10041639	15185355	15189194	+	Y1150_ARATH	At1g61500 T25B24.15	G-type lectin S-receptor-like serine/threonine-protein kinase At1g61500 (EC 2.7.11.1)	Cell membrane {ECO:0000250}; Single-pass type I membrane protein {ECO:0000250}.	ath:AT1G61500		innate immune response [GO:0045087]; protein phosphorylation [GO:0006468]; recognition of pollen [GO:0048544]
	Lus10041640	15189361	15190899	-
	Lus10041641	15191713	15193416	-	FUT8_ARATH	FUT8 At1g14100 F7A19.18	Probable fucosyltransferase 8 (AtFUT8) (EC 2.4.1.-)	Golgi apparatus, Golgi stack membrane {ECO:0000250}; Single-pass type II membrane protein {ECO:0000250}. Note=Membrane-bound form in trans cisternae of Golgi. {ECO:0000250}.	ath:AT1G14100	May be involved in cell wall biosynthesis. May act as a fucosyltransferase.	cell wall organization [GO:0071555]; protein glycosylation [GO:0006486]; xyloglucan biosynthetic process [GO:0009969]
	Lus10041642	15194829	15196439	-	FUT1_ARATH	FUT1 FT1 MUR2 At2g03220 T18E12.11	Galactoside 2-alpha-L-fucosyltransferase (EC 2.4.1.-) (Xyloglucan alpha-(1,2)-fucosyltransferase) (AtFUT1)	Golgi apparatus, Golgi stack membrane {ECO:0000269|PubMed:21143678}; Single-pass type II membrane protein {ECO:0000269|PubMed:21143678}. Golgi apparatus membrane {ECO:0000269|PubMed:25392066}; Single-pass type II membrane protein {ECO:0000305|PubMed:25392066}. Note=Membrane-bound form in trans cisternae of Golgi. {ECO:0000269|PubMed:21143678}.	ath:AT2G03220	Involved in cell wall biosynthesis. Is both necessary and sufficient for the addition of the terminal fucosyl residue on xyloglucan side chains, but is not involved in the fucosylation of other cell wall components (PubMed:10373113, PubMed:11743104, PubMed:11854459, PubMed:14730072). Associates with other xyloglucan-synthesizing enzymes to form multiprotein complexes for xyloglucan synthesis in t…	cell wall organization [GO:0071555]; xyloglucan biosynthetic process [GO:0009969]
	Lus10041643	15197102	15198832	+	CYQ32_CATRO	CYP81Q32	Cytochrome P450 81Q32 (CrCYP81Q32) (EC 1.14.-.-)	Membrane {ECO:0000255}; Single-pass membrane protein {ECO:0000255}.
	Lus10041644	15199482	15201017	-	FUT1_PEA	FT1	Galactoside 2-alpha-L-fucosyltransferase (EC 2.4.1.-) (PsFT1) (Xyloglucan alpha-(1,2)-fucosyltransferase)	Golgi apparatus, Golgi stack membrane {ECO:0000250}; Single-pass type II membrane protein {ECO:0000250}. Note=Membrane-bound form in trans cisternae of Golgi. {ECO:0000250}.		Involved in cell wall biosynthesis. Adds the terminal fucosyl residue on xyloglucan side chains. {ECO:0000269|PubMed:10747946}.	cell wall biogenesis [GO:0042546]; cell wall organization [GO:0071555]; protein glycosylation [GO:0006486]
	Lus10041645	15202751	15204211	-	FUT1_PEA	FT1	Galactoside 2-alpha-L-fucosyltransferase (EC 2.4.1.-) (PsFT1) (Xyloglucan alpha-(1,2)-fucosyltransferase)	Golgi apparatus, Golgi stack membrane {ECO:0000250}; Single-pass type II membrane protein {ECO:0000250}. Note=Membrane-bound form in trans cisternae of Golgi. {ECO:0000250}.		Involved in cell wall biosynthesis. Adds the terminal fucosyl residue on xyloglucan side chains. {ECO:0000269|PubMed:10747946}.	cell wall biogenesis [GO:0042546]; cell wall organization [GO:0071555]; protein glycosylation [GO:0006486]
	Lus10041646	15205421	15210254	+	LOX21_SOLTU	LOX2.1 LOX-H1	Linoleate 13S-lipoxygenase 2-1, chloroplastic (EC 1.13.11.12) (Lipoxygenase 2-1)	Plastid, chloroplast stroma {ECO:0000269|PubMed:11675388, ECO:0000269|PubMed:17210991}. Plastid, chloroplast thylakoid {ECO:0000269|PubMed:17210991}. Note=Associated with the non-appressed part of the thylakoid membrane. {ECO:0000269|PubMed:17210991}.	sot:102596122	Plant lipoxygenase involved in a number of diverse aspects of plant physiology including growth and development, pest resistance, and senescence. May not be involved in the bulk production of jasmonate upon wounding. Catalyzes the hydroperoxidation of lipids containing a cis,cis-1,4-pentadiene structure. Linolenic acid is the preferred substrate, before linoleic and arachidonic acids. Has also so…	fatty acid biosynthetic process [GO:0006633]; green leaf volatile biosynthetic process [GO:0010597]; lipid oxidation [GO:0034440]; oxylipin biosynthetic process [GO:0031408]
Lu05_5724521	Lus10034900	5731539	5735460	+	SBT18_ARATH	SBT1.8 At2g05920 T6P5.12	Subtilisin-like protease SBT1.8 (EC 3.4.21.-) (Subtilase subfamily 1 member 8) (AtSBT1.8)	Secreted {ECO:0000250|UniProtKB:Q84WS0}.	ath:AT2G05920
Lu05_13783875	Lus10007347	13761016	13761957	-	PMD1_ARATH	PMD1 At3g58840 T20N10.190	Peroxisomal and mitochondrial division factor 1	Peroxisome membrane {ECO:0000269|PubMed:22147290}; Single-pass membrane protein {ECO:0000255}. Mitochondrion outer membrane {ECO:0000269|PubMed:21896887, ECO:0000269|PubMed:22147290}; Single-pass membrane protein {ECO:0000255}.	ath:AT3G58840	Involved in morphogenesis and proliferation of peroxisomes and mitochondria, independently from the previously defined pathway controlled by the FIS1-DRP3 complex. {ECO:0000269|PubMed:22147290}.	mitochondrion organization [GO:0007005]; peroxisome organization [GO:0007031]
	Lus10007348	13763409	13767598	-	XTH1_DIOKA	XTH1	Xyloglucan endotransglucosylase protein 1 (XET protein 1) (EC 2.4.1.207) (DkXTH1) (Xyloglucan endotransglucosylase/hydrolase protein 1) (XTH protein 1)	Secreted, cell wall {ECO:0000255|RuleBase:RU361120, ECO:0000269|PubMed:25849978}. Secreted, extracellular space, apoplast {ECO:0000255|RuleBase:RU361120}.		Catalyzes xyloglucan endotransglycosylation (XET). Cleaves and religates xyloglucan polymers. Does not catalyze xyloglucan endohydrolysis (XEH) (PubMed:25849978). Overexpression in Arabidopsis transgenic plants results in elevated tolerance to abiotic stress, such as salt, ABA (abscisic acid) and drought stresses, and in the production of wider leaves. Overexpression in transgenic tomato plants s…	cell wall biogenesis [GO:0042546]; cell wall organization [GO:0071555]; xyloglucan metabolic process [GO:0010411]
	Lus10007349	13769445	13770494	+	XTH1_DIOKA	XTH1	Xyloglucan endotransglucosylase protein 1 (XET protein 1) (EC 2.4.1.207) (DkXTH1) (Xyloglucan endotransglucosylase/hydrolase protein 1) (XTH protein 1)	Secreted, cell wall {ECO:0000255|RuleBase:RU361120, ECO:0000269|PubMed:25849978}. Secreted, extracellular space, apoplast {ECO:0000255|RuleBase:RU361120}.		Catalyzes xyloglucan endotransglycosylation (XET). Cleaves and religates xyloglucan polymers. Does not catalyze xyloglucan endohydrolysis (XEH) (PubMed:25849978). Overexpression in Arabidopsis transgenic plants results in elevated tolerance to abiotic stress, such as salt, ABA (abscisic acid) and drought stresses, and in the production of wider leaves. Overexpression in transgenic tomato plants s…	cell wall biogenesis [GO:0042546]; cell wall organization [GO:0071555]; xyloglucan metabolic process [GO:0010411]
	Lus10007350	13771407	13773112	+	PGPP1_ARATH	PGPP1 At3g58830 T20N10.180	Phosphatidylglycerophosphate phosphatase 1, chloroplastic/mitochondrial (AtPGPP1) (PGP phosphatase 1) (EC 3.1.3.27)	Plastid, chloroplast {ECO:0000269|PubMed:27541283, ECO:0000269|PubMed:27614107, ECO:0000269|PubMed:29476828}. Mitochondrion {ECO:0000269|PubMed:29476828}. Note=Localized in chloroplast of leaf mesophyll cells, but in mitochondrion of root cells. {ECO:0000269|PubMed:29476828}.	ath:AT3G58830	Phosphatidylglycerophosphate (PGP) phosphatase involved in the biosynthesis of phosphatidylglycerol (PG), a phosphoglycerolipid predominantly present in chloroplastic thylakoid membranes and which has important photosynthetic function; seems to use PGP 34:3, PGP 34:2 and PGP 34:1 as substrates (PubMed:27541283, PubMed:27614107, PubMed:29476828). Required for thylakoid membranes development and ch…	chloroplast organization [GO:0009658]; glycerolipid metabolic process [GO:0046486]; lipid biosynthetic process [GO:0008610]; phosphatidylglycerol biosynthetic process [GO:0006655]; phospholipid dephosphorylation [GO:0046839]; photosynthesis [GO:0015979]; root development [GO:0048364]; thylakoid membrane organization [GO:0010027]
	Lus10007351	13775715	13776843	+	PDF1_ARATH	PDF1 At2g42840 F7D19.16	Protodermal factor 1		ath:AT2G42840	May be involved in the regulation of meristem growth. {ECO:0000305}.
	Lus10007352	13779527	13779829	+	PDF1_ARATH	PDF1 At2g42840 F7D19.16	Protodermal factor 1		ath:AT2G42840	May be involved in the regulation of meristem growth. {ECO:0000305}.
	Lus10007353	13781827	13783965	-	PPR6_ARATH	At1g03100 F10O3.8	Pentatricopeptide repeat-containing protein At1g03100, mitochondrial	Mitochondrion {ECO:0000305}.	ath:AT1G03100
	Lus10007354	13785345	13786376	-
	Lus10007355	13788528	13790756	+	RHM1_ARATH	RHM1 ROL1 At1g78570 T30F21.10	Trifunctional UDP-glucose 4,6-dehydratase/UDP-4-keto-6-deoxy-D-glucose 3,5-epimerase/UDP-4-keto-L-rhamnose-reductase RHM1 (Protein REPRESSOR OF LRX1 1) (Rhamnose biosynthetic enzyme 1) (AtRHM1) [Includes: UDP-glucose 4,6-dehydratase (EC 4.2.1.76); UDP-4-keto-6-deoxy-D-glucose 3,5-epimerase/UDP-4-keto-L-rhamnose 4-keto-reductase (EC 1.1.1.-) (EC 5.1.3.-)]	Cytoplasm, cytosol {ECO:0000269|PubMed:19056285, ECO:0000269|PubMed:21502189}.	ath:AT1G78570	Trifunctional enzyme involved in UDP-beta-L-rhamnose biosynthesis, a precursor of the primary cell wall components rhamnogalacturonan I (RG-I) and rhamnogalacturonan II (RG-II) (PubMed:14671019, PubMed:17190829, PubMed:19056285). Plays a major role in supplying UDP-rhamnose for flavonol biosynthesis (PubMed:18757557). Catalyzes the dehydration of UDP-glucose to form UDP-4-dehydro-6-deoxy-D-glucos…	auxin efflux [GO:0010315]; cell differentiation [GO:0030154]; cell wall organization [GO:0071555]; flavonol biosynthetic process [GO:0051555]; regulation of cell population proliferation [GO:0042127]; UDP-rhamnose biosynthetic process [GO:0010253]
	Lus10007356	13796832	13798415	-
	Lus10007357	13802918	13805875	-	ETR1_PRUPE	ETR1	Ethylene receptor (EC 2.7.13.3)	Endoplasmic reticulum membrane {ECO:0000250}; Multi-pass membrane protein {ECO:0000250}.		May act early in the ethylene signal transduction pathway, possibly as an ethylene receptor, or as a regulator of the pathway. {ECO:0000250}.
	Lus10007358	13807387	13810015	-	MAIL2_ARATH	At2g04865	Protein MAIN-LIKE 2	Nucleus {ECO:0000269|PubMed:24635680}.	ath:AT2G04865	Maybe required to maintain cell division activity in meristematic cells. {ECO:0000250|UniProtKB:Q9LMT7}.	meristem maintenance [GO:0010073]
	Lus10007359	13811351	13815007	+	DRL42_ARATH	At5g66900 MUD21.16	Probable disease resistance protein At5g66900		ath:AT5G66900	Probable disease resistance protein. {ECO:0000250}.	defense response to fungus [GO:0050832]
Lu05_13873867	Lus10007369	13859827	13861647	+	CNL_PETHY	CNL AAE	Trans-cinnamate:CoA ligase, peroxisomal (Cinnamic acid:CoA ligase) (Ph-CNL) (PhCNL) (EC 6.2.1.-) ((E)-caffeate:CoA ligase CNL) (EC 6.2.1.-) (4-coumarate:CoA ligase CNL) (EC 6.2.1.12) (Protein ACYL-ACTIVATING ENZYME) (PhAAE)	Peroxisome {ECO:0000269|PubMed:22649270, ECO:0000269|PubMed:22771854}. Note=Located in the peroxisomes of flower petal limb cells. {ECO:0000269|PubMed:22771854}.		Involved in the biosynthesis of floral volatile benzenoid/phenylpropanoid (FVBP) scent (e.g. benzylbenzoate, phenylethylbenzoate, and methylbenzoate) (PubMed:22771854, PubMed:22649270). Catalyzes the formation of CoA esters of cinnamic acid, and, with lower efficiency, of 4-coumaric acid and caffeic acid (PubMed:22649270). {ECO:0000269|PubMed:22649270, ECO:0000269|PubMed:22771854}.	cinnamic acid biosynthetic process [GO:0009800]; cinnamic acid metabolic process [GO:0009803]; circadian rhythm [GO:0007623]; green leaf volatile biosynthetic process [GO:0010597]; phenylpropanoid metabolic process [GO:0009698]; phytoalexin biosynthetic process [GO:0052315]; response to ethylene [GO:0009723]
	Lus10007370	13863972	13872471	+	UGPA_MUSAC	UGPA	UTP--glucose-1-phosphate uridylyltransferase (EC 2.7.7.9) (UDP-glucose pyrophosphorylase) (UDPGP) (UGPase)	Cytoplasm {ECO:0000250}.		Plays a central role as a glucosyl donor in cellular metabolic pathways. {ECO:0000250}.	UDP-glucose metabolic process [GO:0006011]
	Lus10007371	13873448	13874392	+	AGL82_ARATH	AGL82 At5g58890	Agamous-like MADS-box protein AGL82	Nucleus {ECO:0000255|PROSITE-ProRule:PRU00251}.	ath:AT5G58890	Probable transcription factor that may function in the maintenance of the proper function of the central cell in pollen tube attraction. {ECO:0000305|PubMed:26462908}.	positive regulation of transcription by RNA polymerase II [GO:0045944]; regulation of transcription by RNA polymerase II [GO:0006357]
	Lus10007372	13876146	13879804	+	SUS5_ORYSJ	SUS5 Os04g0309600 LOC_Os04g24430 OSJNBa0033H08.16	Sucrose synthase 5 (OsSUS5) (EC 2.4.1.13) (Sucrose-UDP glucosyltransferase 5)	Cytoplasm {ECO:0000269|PubMed:21533550}. Membrane {ECO:0000269|PubMed:21533550}; Peripheral membrane protein {ECO:0000269|PubMed:21533550}.	osa:4335447	Sucrose-cleaving enzyme that provides UDP-glucose and fructose for various metabolic pathways. {ECO:0000250}.	sucrose metabolic process [GO:0005985]
	Lus10007373	13880565	13881223	-
	Lus10007374	13883272	13883577	+	GXM2_ARATH	GXM2 At4g09990 T5L19.120	Glucuronoxylan 4-O-methyltransferase 2 (EC 2.1.1.112)	Golgi apparatus membrane {ECO:0000269|PubMed:23045523}; Single-pass membrane protein {ECO:0000269|PubMed:23045523}.	ath:AT4G09990	Methyltransferase catalyzing 4-O-methylation of glucuronic acid side chains on xylan. {ECO:0000269|PubMed:23045523}.	methylation [GO:0032259]; plant-type secondary cell wall biogenesis [GO:0009834]; xylan biosynthetic process [GO:0045492]; xylan metabolic process [GO:0045491]
	Lus10007375	13884182	13885301	-
	Lus10007376	13886688	13888512	-	RS6_ASPOF	rps6	40S ribosomal protein S6			Component of the 40S small ribosomal subunit (By similarity). Plays an important role in controlling cell growth and proliferation through the selective translation of particular classes of mRNA (By similarity). {ECO:0000250|UniProtKB:P62753}.	translation [GO:0006412]
	Lus10007377	13889326	13893017	-	NAC45_ARATH	NAC045 At3g03200 T17B22.11	NAC domain-containing protein 45	Nucleus {ECO:0000255|PROSITE-ProRule:PRU00353}.	ath:AT3G03200	Transcription factor directing sieve element enucleation and cytosol degradation. Not required for formation of lytic vacuoles. Regulates, with NAC086, the transcription of NEN1, NEN2, NEN3, NEN4, RTM1, RTM2, UBP16, PLDZETA, ABCB10 and At1g26450. {ECO:0000269|PubMed:25081480}.	sieve element differentiation [GO:0090603]; sieve element enucleation [GO:0090602]
	Lus10007378	13900477	13901109	+
	Lus10007379	13901798	13903559	-
Lu06_1935251	Lus10017633	1963624	1965138	+	PP129_ARATH	At1g77360 F2P24.7	Pentatricopeptide repeat-containing protein At1g77360, mitochondrial	Mitochondrion {ECO:0000305}.	ath:AT1G77360
	Lus10017634	1960680	1962091	-	RHD6_ARATH	RHD6 BHLH83 EN112 At1g66470 F28G11.9	Transcription factor RHD6 (Basic helix-loop-helix protein 83) (AtbHLH83) (bHLH 83) (Protein ROOT HAIR DEFECTIVE 6) (AtRHD6) (Transcription factor EN 112) (Transcription factor bHLH83) (bHLH transcription factor bHLH083)	Nucleus {ECO:0000255|PROSITE-ProRule:PRU00981, ECO:0000269|PubMed:17556585, ECO:0000269|PubMed:31988260}.	ath:AT1G66470	Transcription factor that is specifically required for the development of root hairs (PubMed:17556585). Acts with RSL1 to positively regulate root hair development (PubMed:17556585). Acts downstream of genes that regulate epidermal pattern formation, such as GL2 (PubMed:17556585). Targets directly RSL4, another transcription factor involved in the regulation of root hair elongation (PubMed:201399…	regulation of transcription by RNA polymerase II [GO:0006357]; root hair initiation [GO:0048766]
	Lus10017635	1955587	1958004	-	PUB4_ARATH	PUB4 At2g23140 T20D16.23	U-box domain-containing protein 4 (EC 2.3.2.27) (Plant U-box protein 4) (RING-type E3 ubiquitin transferase PUB4)		ath:AT2G23140	Functions as an E3 ubiquitin ligase. {ECO:0000250}.
	Lus10017636	1952289	1953464	-	DEGP7_ARATH	DEGP7 At3g03380 T21P5.19 T21P5.20	Protease Do-like 7 (EC 3.4.21.-)	Cytoplasm {ECO:0000305}.	ath:AT3G03380	Probable serine protease.	photoinhibition [GO:0010205]
	Lus10017637	1944229	1951630	-	DEGP7_ARATH	DEGP7 At3g03380 T21P5.19 T21P5.20	Protease Do-like 7 (EC 3.4.21.-)	Cytoplasm {ECO:0000305}.	ath:AT3G03380	Probable serine protease.	photoinhibition [GO:0010205]
	Lus10017638	1940831	1943473	+	NPG1_ARATH	NPG1 NPG At2g43040 MFL8.10	Protein NPG1 (NO POLLEN GERMINATION 1)		ath:AT2G43040	Calmodulin-binding protein essential for pollen germination, but not necessary for microsporogenesis or gametogenesis (PubMed:12928497). {ECO:0000269|PubMed:12928497}.	pollen development [GO:0009555]; pollen germination [GO:0009846]
	Lus10017639	1936126	1938987	+	DTX41_ARATH	DTX41 TDS3 TT12 At3g59030 F17J16_80	Protein DETOXIFICATION 41 (AtDTX41) (Multidrug and toxic compound extrusion protein 41) (MATE protein 41) (Protein TANNIN-DEFICIENT SEED 3) (Protein TRANSPARENT TESTA 12)	Vacuole membrane {ECO:0000269|PubMed:17601828, ECO:0000269|PubMed:25891958}; Multi-pass membrane protein {ECO:0000269|PubMed:17601828, ECO:0000269|PubMed:25891958}. Note=Tonoplast.	ath:AT3G59030	Acts as a flavonoid/H(+)-antiporter that control the vacuolar sequestration of flavonoids in the seed coat endothelium (PubMed:11283341, PubMed:17601828). Could transport the anthocyanin cyanidin-3-O-glucoside (PubMed:17601828) and epicatechin 3'-O-glucoside (PubMed:19684242) in vitro. {ECO:0000269|PubMed:11283341, ECO:0000269|PubMed:17601828, ECO:0000269|PubMed:19684242}.	flavonoid biosynthetic process [GO:0009813]; maintenance of seed dormancy [GO:0010231]; proanthocyanidin biosynthetic process [GO:0010023]; xenobiotic detoxification by transmembrane export across the plasma membrane [GO:1990961]
	Lus10017640	1930305	1935554	+	ARFF_ARATH	ARF6 At1g30330 T4K22.6	Auxin response factor 6	Nucleus.	ath:AT1G30330	Auxin response factors (ARFs) are transcriptional factors that bind specifically to the DNA sequence 5'-TGTCTC-3' found in the auxin-responsive promoter elements (AuxREs). Seems to act as transcriptional activator. Formation of heterodimers with Aux/IAA proteins may alter their ability to modulate early auxin response genes expression. Regulates both stamen and gynoecium maturation. Promotes jasm…	auxin-activated signaling pathway [GO:0009734]; flower development [GO:0009908]; response to auxin [GO:0009733]
	Lus10017641	1922888	1928432	+	ARFF_ORYSJ	ARF6 ARF6A Os02g0164900 LOC_Os02g06910 OJ1661_C12.26 OsJ_005343 OSJNBa0023I17.9	Auxin response factor 6 (OsARF6a)	Nucleus {ECO:0000255|PROSITE-ProRule:PRU00326}.	osa:4328406	Auxin response factors (ARFs) are transcriptional factors that bind specifically to the DNA sequence 5'-TGTCTC-3' found in the auxin-responsive promoter elements (AuxREs).	auxin-activated signaling pathway [GO:0009734]; regulation of transcription, DNA-templated [GO:0006355]
	Lus10017642	1916943	1919103	+
	Lus10017643	1914714	1915454	-
Lu06_15152239	Lus10014382	15174141	15181331	+	GLGB1_PEA	SBEI	1,4-alpha-glucan-branching enzyme 1, chloroplastic/amyloplastic (EC 2.4.1.18) (Starch branching enzyme I)	Plastid, chloroplast. Plastid, amyloplast {ECO:0000305}.		Catalyzes the formation of the alpha-1,6-glucosidic linkages in starch by scission of a 1,4-alpha-linked oligosaccharide from growing alpha-1,4-glucan chains and the subsequent attachment of the oligosaccharide to the alpha-1,6 position. May preferentially transfer short chains during branching. Responsible for the synthesis of about 75% of the amylopectin found in the starch granules of mature e…	embryo development ending in seed dormancy [GO:0009793]; glycogen biosynthetic process [GO:0005978]; starch biosynthetic process [GO:0019252]
	Lus10014383	15171401	15172856	+	RLPH2_ARATH	RLPH2 At3g09970 T22K18.22	Tyrosine-protein phosphatase RLPH2 (EC 3.1.3.48) (Protein RHIZOBIALE-LIKE PHOSPHATASE 2)	Cytoplasm, cytosol {ECO:0000269|PubMed:26742850}.	ath:AT3G09970	Protein phosphatase that dephosphorylates specifically tyrosine-phosphorylated peptides; especially active on dual-phosphorylated substrates containing a phosphothreonine-X-phosphotyrosine motif. {ECO:0000269|PubMed:26742850}.	peptidyl-tyrosine dephosphorylation [GO:0035335]
	Lus10014384	15160734	15167411	+	AB39G_ARATH	ABCG39 PDR11 PDR13 At1g66950 F1O19.3 T4O24.9	ABC transporter G family member 39 (ABC transporter ABCG.39) (AtABCG39) (Pleiotropic drug resistance protein 11)	Membrane {ECO:0000250}; Multi-pass membrane protein {ECO:0000250}.	ath:AT1G66950	May be a general defense protein. {ECO:0000250}.	response to reactive oxygen species [GO:0000302]; xenobiotic transport [GO:0042908]
	Lus10014385	15152556	15153457	+	BD31A_ORYSJ	Os01g0857700 LOC_Os01g63890 OsJ_004032 P0683F02.14; Os04g0646100 LOC_Os04g55290 OsJ_015680 OSJNBa0070O11.6	Protein BUD31 homolog 1 (Protein G10 homolog 1)	Nucleus {ECO:0000305}.	osa:4324760; osa:4337198		mRNA splicing, via spliceosome [GO:0000398]
	Lus10014386	15143854	15150425	+	AGO5_ARATH	AGO5 At2g27880 T1E2.20	Protein argonaute 5		ath:AT2G27880	Involved in RNA-mediated post-transcriptional gene silencing (PTGS). Main component of the RNA-induced silencing complex (RISC) that binds to a short guide RNA such as a microRNA (miRNA) or small interfering RNA (siRNA). RISC uses the mature miRNA or siRNA as a guide for slicer-directed cleavage of homologous mRNAs to repress gene expression. Associates with siRNAs of various sizes, from 21-24 nu…	defense response to other organism [GO:0098542]; gene silencing by RNA [GO:0031047]; regulation of translation [GO:0006417]; response to virus [GO:0009615]; RNAi-mediated antiviral immune response [GO:0009616]
	Lus10014387	15138885	15140824	+	WAKLQ_ARATH	WAKL20 At5g02070 T7H20_120	Wall-associated receptor kinase-like 20 (EC 2.7.11.-)	Membrane {ECO:0000305}; Single-pass type I membrane protein {ECO:0000305}.	ath:AT5G02070	Serine/threonine-protein kinase that may function as a signaling receptor of extracellular matrix component.	cell surface receptor signaling pathway [GO:0007166]
	Lus10014388	15133868	15137672	+	SCP45_ARATH	SCPL45 At1g28110 F13K9.20	Serine carboxypeptidase-like 45 (EC 3.4.16.-)	Secreted {ECO:0000305}.	ath:AT1G28110	Probable carboxypeptidase. {ECO:0000250}.
	Lus10014389	15131412	15132884	+	CHUP1_ARATH	CHUP1 At3g25690 T5M7.14	Protein CHUP1, chloroplastic (Protein CHLOROPLAST UNUSUAL POSITIONING 1)	Plastid, chloroplast outer membrane {ECO:0000269|PubMed:14615600, ECO:0000269|PubMed:18193273, ECO:0000269|PubMed:18431481, ECO:0000269|PubMed:18715957}; Peripheral membrane protein {ECO:0000269|PubMed:14615600, ECO:0000269|PubMed:18193273, ECO:0000269|PubMed:18431481, ECO:0000269|PubMed:18715957}; Cytoplasmic side {ECO:0000269|PubMed:14615600, ECO:0000269|PubMed:18193273, ECO:0000269|PubMed:1843…	ath:AT3G25690	Required for the positioning and movement of chloroplasts. Interacts with profilin and actin independent of its polymerization status. Regulates chloroplast localization by anchoring chloroplasts to the plasma membrane and forming a bridge to the actin cytoskeleton. {ECO:0000269|PubMed:12490952, ECO:0000269|PubMed:14615600, ECO:0000269|PubMed:18193273, ECO:0000269|PubMed:18715957}.	chloroplast organization [GO:0009658]; chloroplast relocation [GO:0009902]
	Lus10014390	15125033	15127845	-	THD1_ARATH	OMR1 At3g10050 T22K18.12	Threonine dehydratase biosynthetic, chloroplastic (EC 4.3.1.19) (Threonine deaminase) (TD)	Plastid, chloroplast {ECO:0000250}.	ath:AT3G10050	Catalyzes the formation of alpha-ketobutyrate from threonine in a two-step reaction. The first step is a dehydration of threonine, followed by rehydration and liberation of ammonia.	isoleucine biosynthetic process [GO:0009097]; threonine catabolic process [GO:0006567]
Lu07_1625677	Lus10028797	1653841	1655575	+	RD19A_ARATH	RD19A At4g39090 F19H22.190	Cysteine protease RD19A (EC 3.4.22.-) (Protein RESPONSIVE TO DEHYDRATION 19) (RD19)	Lytic vacuole {ECO:0000269|PubMed:18708476}. Nucleus {ECO:0000269|PubMed:18708476}. Note=Predominantly vacuolar. From the Golgi apparatus, probably transported to the lytic vacuole (LV) in clathrin-coated vesicles (CCVs) via the prevacuolar compartment (PVC). Relocalizes to the nucleus when associated in a complex with the Ralstonia solanacearum type III effector PopP2. {ECO:0000269|PubMed:187084…	ath:AT4G39090	Probable thiol protease (By similarity). Required for RRS1-mediated resistance against Ralstonia solanacearum. Plays a crucial role as host factor for PopP2-triggered RRS1-mediated resistance. Interacts with the R.solanacearum type III effector PopP2 to form a nuclear complex that is required for activation of the RRS1-mediated resistance response (PubMed:18708476). {ECO:0000250|UniProtKB:P43297,…	defense response to bacterium [GO:0042742]; proteolysis involved in cellular protein catabolic process [GO:0051603]; response to osmotic stress [GO:0006970]; response to salt stress [GO:0009651]
	Lus10028798	1649428	1651357	-	PPAF2_IPOBA	PAP2	Purple acid phosphatase 2 (EC 3.1.3.2) (Manganese(II) purple acid phosphatase 2)	Secreted {ECO:0000250}.
	Lus10028799	1645359	1648474	-	PPAF2_IPOBA	PAP2	Purple acid phosphatase 2 (EC 3.1.3.2) (Manganese(II) purple acid phosphatase 2)	Secreted {ECO:0000250}.
	Lus10028800	1638994	1643192	-	WDR5A_ARATH	WDR5A At3g49660 T16K5.10	COMPASS-like H3K4 histone methylase component WDR5A (AtWDR5A)	Nucleus {ECO:0000269|PubMed:19567704, ECO:0000269|PubMed:21423667}.	ath:AT3G49660	Forms multiple COMPASS-like complexes involved in histone methylation by interacting with different histone H3 'Lys-4' methyltransferases such as ATX1, SDG14 or SDG16 (PubMed:21423667). Binds to target loci chromatin, increasing H3K4 trimethylation and causing activation of the gene (PubMed:19567704). Up-regulates FLC and MAF4 expression to delay flowering (PubMed:19567704). Present at the promot…	histone H3-K4 methylation [GO:0051568]; vegetative to reproductive phase transition of meristem [GO:0010228]
	Lus10028801	1636046	1638168	+	SHL_ARATH	SHL SHL1 At4g39100 F19H22.200	Chromatin remodeling protein SHL (Protein SHORT LIFE)	Nucleus {ECO:0000255|PROSITE-ProRule:PRU00768, ECO:0000269|PubMed:11129039}.	ath:AT4G39100	Chromatin remodeling factor that binds to methylated histone (e.g. H3K4me2/3) to prevent their acetylation (e.g. H3K9K14Ac), likely by recruiting histone deacetylase (HDAC) complexes, and thus regulate the transcription of target genes (PubMed:25281686). Required during development and for fertility, probably by modulating developmental gene expression (PubMed:11129039, PubMed:15082927, PubMed:25…	chromatin organization [GO:0006325]; flower development [GO:0009908]; negative regulation of histone acetylation [GO:0035067]; post-embryonic development [GO:0009791]; regulation of photoperiodism, flowering [GO:2000028]; regulation of transcription, DNA-templated [GO:0006355]; vegetative to reproductive phase transition of meristem [GO:0010228]
	Lus10028802	1625608	1628140	-	BLH6_ARATH	BLH6 At4g34610 T4L20.190	BEL1-like homeodomain protein 6 (BEL1-like protein 6)	Nucleus {ECO:0000305}.	ath:AT4G34610		regulation of transcription by RNA polymerase II [GO:0006357]
	Lus10028803	1621667	1624473	+	NFD4_ARATH	NFD4 At1g31470 T8E3.15	Protein NUCLEAR FUSION DEFECTIVE 4	Membrane {ECO:0000255}; Multi-pass membrane protein {ECO:0000255}.	ath:AT1G31470	Required for karyogamy during female gametophyte development, when the two polar nuclei fuse to form the diploid central cell nucleus (PubMed:16698901). {ECO:0000269|PubMed:16698901}.	karyogamy [GO:0000741]; polar nucleus fusion [GO:0010197]; response to salt stress [GO:0009651]
	Lus10028804	1615875	1620525	-	SAE2_ARATH	SAE2 EMB2764 At2g21470 F3K23.23	SUMO-activating enzyme subunit 2 (EC 2.3.2.-) (Protein EMBRYO DEFECTIVE 2764) (Ubiquitin-like 1-activating enzyme E1B)	Nucleus.	ath:AT2G21470	The dimeric enzyme acts as an E1 ligase for SUMO1 and SUMO2. It mediates ATP-dependent activation of SUMO proteins and formation of a thioester with a conserved cysteine residue on SAE2. {ECO:0000269|PubMed:17644626}.	embryo development ending in seed dormancy [GO:0009793]; protein modification by small protein conjugation [GO:0032446]; protein sumoylation [GO:0016925]
	Lus10028805	1612374	1615154	+	Y4391_ARATH	At4g39110 F19H22.210 T22F8.10	Probable receptor-like protein kinase At4g39110 (EC 2.7.11.-)	Membrane {ECO:0000305}; Single-pass membrane protein {ECO:0000305}.	ath:AT4G39110		pollen development [GO:0009555]; protein autophosphorylation [GO:0046777]; regulation of pollen tube growth [GO:0080092]
	Lus10028806	1610666	1611097	+	PSAG_ARATH	PSAG At1g55670 F20N2.21 F20N2.33 F20N2_3	Photosystem I reaction center subunit V, chloroplastic (PSI-G)	Plastid, chloroplast membrane {ECO:0000255}; Multi-pass membrane protein {ECO:0000255}.	ath:AT1G55670	Not yet known.	photosynthesis [GO:0015979]; photosynthetic electron transport in photosystem I [GO:0009773]; photosynthetic NADP+ reduction [GO:0009780]; photosystem I stabilization [GO:0042550]; protein stabilization [GO:0050821]
	Lus10028807	1607350	1609858	+	PS10B_ARATH	RPT4B At1g45000 F27F5.8	26S proteasome regulatory subunit S10B homolog B (26S proteasome AAA-ATPase subunit RPT4b) (26S proteasome subunit S10B homolog B) (Regulatory particle triple-A ATPase subunit 4b)	Cytoplasm {ECO:0000250}. Nucleus {ECO:0000250}.	ath:AT1G45000	The 26S proteasome is involved in the ATP-dependent degradation of ubiquitinated proteins. The regulatory (or ATPase) complex confers ATP dependency and substrate specificity to the 26S complex.	positive regulation of RNA polymerase II transcription preinitiation complex assembly [GO:0045899]; proteasome-mediated ubiquitin-dependent protein catabolic process [GO:0043161]; ubiquitin-dependent ERAD pathway [GO:0030433]
	Lus10028808	1604870	1605615	+	RS30_ARATH	RPS30A At2g19750 F6F22.22; RPS30B At4g29390 F17A13.210; RPS30C At5g56670 MIK19.12	40S ribosomal protein S30		ath:AT2G19750; ath:AT4G29390; ath:AT5G56670		translation [GO:0006412]
	Lus10028809	1601844	1603773	+	DNJ10_ARATH	ATJ10 C10 J10 At1g76700 F28O16.7	Chaperone protein dnaJ 10 (AtDjC10) (AtJ10)		ath:AT1G76700	Plays a continuous role in plant development probably in the structural organization of compartments. {ECO:0000250}.
	Lus10028810	1597098	1599758	+	AB1F_ARATH	ABCF1 GCN1 At5g60790 MAE1.10	ABC transporter F family member 1 (ABC transporter ABCF.1) (AtABCF1) (GCN20-type ATP-binding cassette protein GCN1)		ath:AT5G60790
	Lus10028811	1592622	1595828	+	SPD1_ARATH	SPD1 At3g10420 F13M14.30	Protein SEEDLING PLASTID DEVELOPMENT 1	Plastid, chloroplast membrane {ECO:0000269|PubMed:21045120}; Peripheral membrane protein {ECO:0000269|PubMed:21045120}; Intermembrane side {ECO:0000269|PubMed:21045120}. Plastid, chloroplast envelope {ECO:0000269|PubMed:21045120}.	ath:AT3G10420	Required during eoplast (a highly reduced plastid type present during the degreening and dehydration stages of seed maturation) development in embryos and early stages of eoplast redifferentiation during seedling growth. {ECO:0000269|PubMed:21045120}.	plastid organization [GO:0009657]; reversible differentiation [GO:0090677]; seed maturation [GO:0010431]
Lu07_2061590	Lus10017560	2033197	2035360	+	INT4_ARATH	INT4 At4g16480 dl4265w FCAALL.375	Inositol transporter 4 (Myo-inositol-proton symporter INT4) (Protein INOSITOL TRANSPORTER 4)	Cell membrane {ECO:0000269|PubMed:16603666, ECO:0000269|PubMed:22253225}; Multi-pass membrane protein {ECO:0000269|PubMed:16603666, ECO:0000269|PubMed:22253225}.	ath:AT4G16480	Plasma membrane inositol-proton symporter. Mediates high-affinity myoinositol-proton symport across the plasma membrane. Active with myoinositol, scylloinositol and D-chiroinositol. Low activity with mucoinositol and alloinositol. {ECO:0000269|PubMed:16603666, ECO:0000269|PubMed:17951450}.
	Lus10017561	2036529	2038723	+	INT4_ARATH	INT4 At4g16480 dl4265w FCAALL.375	Inositol transporter 4 (Myo-inositol-proton symporter INT4) (Protein INOSITOL TRANSPORTER 4)	Cell membrane {ECO:0000269|PubMed:16603666, ECO:0000269|PubMed:22253225}; Multi-pass membrane protein {ECO:0000269|PubMed:16603666, ECO:0000269|PubMed:22253225}.	ath:AT4G16480	Plasma membrane inositol-proton symporter. Mediates high-affinity myoinositol-proton symport across the plasma membrane. Active with myoinositol, scylloinositol and D-chiroinositol. Low activity with mucoinositol and alloinositol. {ECO:0000269|PubMed:16603666, ECO:0000269|PubMed:17951450}.
	Lus10017562	2040035	2040438	-	PUB2_ARATH	PUB2 At5g67340 K8K14.6	U-box domain-containing protein 2 (EC 2.3.2.27) (Plant U-box protein 2) (RING-type E3 ubiquitin transferase PUB2)		ath:AT5G67340	Functions as an E3 ubiquitin ligase. {ECO:0000250}.
	Lus10017563	2040966	2041661	-
	Lus10017564	2050657	2052467	+	B561J_ARATH	At5g47530 MNJ7.12	Cytochrome b561 and DOMON domain-containing protein At5g47530 (Protein b561A.tha10)	Membrane {ECO:0000305}; Multi-pass membrane protein {ECO:0000305}.	ath:AT5G47530	May act as a catecholamine-responsive trans-membrane electron transporter. {ECO:0000269|PubMed:15022831}.
	Lus10017565	2053113	2055997	-	MO25N_ARATH	At5g47540 MNJ7.13	Putative MO25-like protein At5g47540		ath:AT5G47540		intracellular signal transduction [GO:0035556]
	Lus10017566	2058112	2061456	-	HSP7S_PEA	HSP70 ST70	Stromal 70 kDa heat shock-related protein, chloroplastic	Plastid, chloroplast stroma.		Interacts with newly imported chloroplast proteins to assist in their maturation.	protein folding [GO:0006457]
	Lus10017567	2064157	2064513	-	CYT5_ARATH	CYS5 At5g47550 MNJ7.14	Cysteine proteinase inhibitor 5 (AtCYS-5)	Secreted {ECO:0000305}.	ath:AT5G47550	Specific inhibitor of cysteine proteinases. Probably involved in the regulation of endogenous processes and in defense against pests and pathogens (By similarity). {ECO:0000250}.	cellular response to heat [GO:0034605]; defense response [GO:0006952]; positive regulation of seed germination [GO:0010030]
	Lus10017568	2067562	2071288	+	AARE2_ORYSJ	Os10g0415800 LOC_Os10g28030	Acylamino-acid-releasing enzyme 2 (AARE2) (EC 3.4.19.1)	Cytoplasm {ECO:0000250|UniProtKB:Q84LM4}.	osa:4348628	Catalyzes the hydrolysis of the N-terminal peptide bond of an N-acetylated peptide to generate an N-acetylated amino acid and a peptide with a free N-terminus. {ECO:0000250|UniProtKB:Q84LM4}.
	Lus10003792	2074211	2077951	+	UPL5_ARATH	UPL5 At4g12570 T1P17.160	E3 ubiquitin-protein ligase UPL5 (Ubiquitin-protein ligase 5) (EC 2.3.2.26) (HECT-type E3 ubiquitin transferase UPL5)	Cytoplasm {ECO:0000269|PubMed:20409006}.	ath:AT4G12570	E3 ubiquitin protein ligase that regulates leaf senescence through ubiquitination and subsequent degradation of WRKY53. {ECO:0000269|PubMed:20409006}.	leaf senescence [GO:0010150]; positive regulation of protein catabolic process [GO:0045732]; proteasome-mediated ubiquitin-dependent protein catabolic process [GO:0043161]; protein polyubiquitination [GO:0000209]; protein ubiquitination [GO:0016567]; response to hydrogen peroxide [GO:0042542]; response to jasmonic acid [GO:0009753]
	Lus10003793	2082837	2083929	+
	Lus10003794	2084497	2085982	+	GDIR_ARATH	GDI1 At3g07880 F17A17.22	Rho GDP-dissociation inhibitor 1 (AtRhoGDI1) (Rho GDI-1)	Cytoplasm {ECO:0000250}.	ath:AT3G07880	Regulates the GDP/GTP exchange reaction of the Rho proteins by inhibiting the dissociation of GDP from them, and the subsequent binding of GTP to them. {ECO:0000250}.	cell tip growth [GO:0009932]; Rho protein signal transduction [GO:0007266]; root epidermal cell differentiation [GO:0010053]
	Lus10003795	2086825	2089116	+	UBP25_ARATH	UBP25 At3g14400 MLN21.18	Ubiquitin carboxyl-terminal hydrolase 25 (EC 3.4.19.12) (Deubiquitinating enzyme 25) (AtUBP25) (Ubiquitin thioesterase 25) (Ubiquitin-specific-processing protease 25)		ath:AT3G14400	Recognizes and hydrolyzes the peptide bond at the C-terminal Gly of ubiquitin. Involved in the processing of poly-ubiquitin precursors as well as that of ubiquitinated proteins (By similarity). {ECO:0000250}.	protein deubiquitination [GO:0016579]; ubiquitin-dependent protein catabolic process [GO:0006511]
	Lus10003796	2089541	2090455	-	PIGP_ARATH	At1g61280 T1F9.23	Phosphatidylinositol N-acetylglucosaminyltransferase subunit P (EC 2.4.1.198)	Membrane {ECO:0000305}; Multi-pass membrane protein {ECO:0000305}.	ath:AT1G61280	Part of the complex catalyzing the transfer of N-acetylglucosamine from UDP-N-acetylglucosamine to phosphatidylinositol, the first step of GPI biosynthesis. {ECO:0000250}.	GPI anchor biosynthetic process [GO:0006506]
Lu07_3130629	Lus10023547	3156616	3160005	+	SFH3_ARATH	SFH3 At2g21540 F2G1.19 F3K23.30	Phosphatidylinositol/phosphatidylcholine transfer protein SFH3 (Protein SEC FOURTEEN HOMOLOGS 3) (AtSFH3)	Golgi apparatus membrane {ECO:0000250}; Peripheral membrane protein {ECO:0000250}. Cell membrane {ECO:0000250}; Peripheral membrane protein {ECO:0000250}.	ath:AT2G21540	Required for transport of secretory proteins from the Golgi complex (By similarity). Catalyzes the transfer of phosphatidylinositol and phosphatidylcholine between membranes in vitro. {ECO:0000250, ECO:0000269|PubMed:16697077}.	flower development [GO:0009908]; protein transport [GO:0015031]
	Lus10023548	3152706	3155360	-	DCDA2_ARATH	LYSA2 diDi 18A-1f At5g11880 F14F18.50	Diaminopimelate decarboxylase 2, chloroplastic (DAP decarboxylase 2) (DAPDC 2) (EC 4.1.1.20)	Plastid, chloroplast {ECO:0000305}.	ath:AT5G11880	Specifically catalyzes the decarboxylation of meso-diaminopimelate (meso-DAP) to L-lysine. {ECO:0000269|PubMed:15652176}.	lysine biosynthetic process via diaminopimelate [GO:0009089]
	Lus10023549	3151258	3151581	-	DRTS_DAUCA		Bifunctional dihydrofolate reductase-thymidylate synthase (DHFR-TS) [Includes: Dihydrofolate reductase (EC 1.5.1.3); Thymidylate synthase (EC 2.1.1.45)]			Bifunctional enzyme. Involved in de novo dTMP biosynthesis. Key enzyme in folate metabolism. Can play two different roles depending on the source of dihydrofolate: de novo synthesis of tetrahydrofolate or recycling of the dihydrofolate released as one of the end products of the TS catalyzed reaction. Catalyzes an essential reaction for de novo glycine and purine synthesis, DNA precursor synthesis…	dTMP biosynthetic process [GO:0006231]; methylation [GO:0032259]; one-carbon metabolic process [GO:0006730]; tetrahydrofolate biosynthetic process [GO:0046654]
	Lus10023550	3149876	3150747	-	DRTS_SOYBN		Bifunctional dihydrofolate reductase-thymidylate synthase (DHFR-TS) [Includes: Dihydrofolate reductase (EC 1.5.1.3); Thymidylate synthase (EC 2.1.1.45)]		gmx:547833	Bifunctional enzyme. Involved in de novo dTMP biosynthesis. Key enzyme in folate metabolism. Can play two different roles depending on the source of dihydrofolate: de novo synthesis of tetrahydrofolate or recycling of the dihydrofolate released as one of the end products of the TS catalyzed reaction. Catalyzes an essential reaction for de novo glycine and purine synthesis, DNA precursor synthesis…	dTMP biosynthetic process [GO:0006231]; methylation [GO:0032259]; one-carbon metabolic process [GO:0006730]; tetrahydrofolate biosynthetic process [GO:0046654]
	Lus10023551	3147544	3148242	+
	Lus10023552	3140440	3141544	-	RS252_ARATH	RPS25B At2g21580 F2G1.15	40S ribosomal protein S25-2		ath:AT2G21580
	Lus10023553	3133167	3135909	-	GLGL1_SOLTU	AGPS1	Glucose-1-phosphate adenylyltransferase large subunit 1 (EC 2.7.7.27) (ADP-glucose pyrophosphorylase) (ADP-glucose synthase) (AGPase S) (Alpha-D-glucose-1-phosphate adenyl transferase) (Fragment)	Plastid, chloroplast. Plastid, amyloplast. Note=Found in the chloroplast in leaf. Found in the plastid in the developing endosperm.		This protein plays a role in synthesis of starch. It catalyzes the synthesis of the activated glycosyl donor, ADP-glucose from Glc-1-P and ATP.	glycogen biosynthetic process [GO:0005978]; starch biosynthetic process [GO:0019252]
	Lus10023554	3130258	3132369	+	FB348_ARATH	At2g16365 F16F14.15	F-box protein At2g16365		ath:AT2G16365		chloroplast organization [GO:0009658]; circadian rhythm [GO:0007623]; positive regulation of transcription, DNA-templated [GO:0045893]; regulation of photomorphogenesis [GO:0010099]
	Lus10023555	3123822	3127535	-
	Lus10023557	3118961	3121929	+	PBER1_ARATH	PCBER1 At4g39230 T22F8.130	Phenylcoumaran benzylic ether reductase 1 (AtPCBER1) (EC 1.23.1.-)		ath:AT4G39230	Oxidoreductase involved in lignan biosynthesis. Catalyzes the NADPH-dependent reduction of phenylcoumaran benzylic ethers. Converts dehydrodiconiferyl alcohol (DDC) to isodihydrodehydrodiconiferyl alcohol (IDDDC), and dihydrodehydrodiconiferyl alcohol (DDDC) to tetrahydrodehydrodiconiferyl alcohol (TDDC). Plays an important role in the biosynthesis of secondary metabolites. In addition to the 8-5…	lignan biosynthetic process [GO:0009807]
	Lus10023558	3116884	3118252	+	PILR3_ARATH	PLR3 At4g34540 T4L20.120	Probable pinoresinol-lariciresinol reductase 3 (AtPLR3) (EC 1.23.1.-) (lariciresinol reductase)		ath:AT4G34540	Probable reductase that might be involved in the reduction of lariciresinol into secoisolariciresinol. In most plant species, a single enzyme is able to reduce both pinoresinol and lariciresinol efficiently while in Arabidopsis, PRR1 and PRR2 show a strict substrate selectivity for pinoresinol.	positive regulation of leaf senescence [GO:1900057]; response to hydroperoxide [GO:0033194]
	Lus10023560	3108970	3110306	+	PME11_ARATH	PME11 ARATH11 At2g21610 F2G1.12	Putative pectinesterase 11 (PE 11) (EC 3.1.1.11) (Pectin methylesterase 11) (AtPME11)	Membrane {ECO:0000305}; Single-pass membrane protein {ECO:0000305}.	ath:AT2G21610	Acts in the modification of cell walls via demethylesterification of cell wall pectin. {ECO:0000250}.	cell wall modification [GO:0042545]; pectin catabolic process [GO:0045490]
	Lus10023561	3105661	3107373	-	WOX8_ORYSJ	WOX8 Os01g0818400 LOC_Os01g60270 OsJ_03880 P0454H12.31	WUSCHEL-related homeobox 8 (OsWOX8) (Protein WOX13)	Nucleus {ECO:0000255|PROSITE-ProRule:PRU00108}.	osa:4327441	Transcription factor which may be involved in developmental processes. {ECO:0000250}.
Lu09_17509381	Lus10042531	17518440	17520410	-	NAC47_ARATH	NAC047 NAC47 SHYG At3g04070	NAC transcription factor 47 (NAC domain-containing protein 47) (ANAC047) (Protein SPEEDY HYPONASTIC GROWTH)	Nucleus {ECO:0000255|PROSITE-ProRule:PRU00353, ECO:0000269|PubMed:24363315}.	ath:AT3G04070	Transcription factor that binds to the promoter of ACO5, an ACC oxidase involved in ethylene biosynthesis. Mediates waterlogging-induced hyponastic leaf movement, and cell expansion in abaxial cells of the basal petiole region, by directly regulating the expression of ACO5 (PubMed:24363315). Required for normal seed development and morphology (PubMed:18849494). {ECO:0000269|PubMed:18849494, ECO:0…	embryo development ending in seed dormancy [GO:0009793]; positive regulation of ethylene biosynthetic process [GO:0010365]; response to flooding [GO:0009413]
	Lus10042532	17514031	17516458	-	DRIP2_ARATH	DRIP2 At2g30580 T6B20.7	E3 ubiquitin protein ligase DRIP2 (EC 2.3.2.27) (DREB2A-interacting protein 2) (RING-type E3 ubiquitin transferase DRIP2)		ath:AT2G30580	E3 ubiquitin-protein ligase that acts as a negative regulator of the response to water stress. Mediates ubiquitination and subsequent proteasomal degradation of the drought-induced transcriptional activator DREB2A. Functionally redundant with DRIP1. {ECO:0000269|PubMed:18552202}.	protein autoubiquitination [GO:0051865]; protein ubiquitination [GO:0016567]; response to water deprivation [GO:0009414]
	Lus10042533	17512590	17513177	-	PFD4_ARATH	AIP3 At1g08780 F22O13.27	Probable prefoldin subunit 4 (ABI3-interacting protein 3)		ath:AT1G08780	Binds specifically to cytosolic chaperonin (c-CPN) and transfers target proteins to it. Binds to nascent polypeptide chain and promotes folding in an environment in which there are many competing pathways for nonnative proteins (By similarity). {ECO:0000250}.	protein folding [GO:0006457]
	Lus10042534	17511255	17512351	+
	Lus10042535	17509124	17509756	+	PRA1E_ARATH	PRA1E PRA4 At1g08770 F22O13.26	PRA1 family protein E (AtPRA1.E) (Prenylated Rab acceptor 4)	Endosome membrane {ECO:0000269|PubMed:18583532}; Multi-pass membrane protein {ECO:0000269|PubMed:18583532}.	ath:AT1G08770	May be involved in both secretory and endocytic intracellular trafficking in the endosomal/prevacuolar compartments. {ECO:0000250}.	vesicle-mediated transport [GO:0016192]
	Lus10042536	17507200	17508086	+
	Lus10042537	17502861	17505651	-	ANX1_ARATH	ANX1 At3g04690 F7O18.16	Receptor-like protein kinase ANXUR1 (EC 2.7.11.1)	Cell membrane {ECO:0000250}; Single-pass type I membrane protein {ECO:0000250}.	ath:AT3G04690	Receptor-like protein kinase that controls pollen tube behavior by directing rupture at proper timing to release the sperm cell. {ECO:0000269|PubMed:19646876}.	protein autophosphorylation [GO:0046777]
	Lus10042538	17492819	17494108	-	WRK74_ARATH	WRKY74 At5g28650 F4I4.30	Probable WRKY transcription factor 74 (WRKY DNA-binding protein 74)	Nucleus {ECO:0000305}.	ath:AT5G28650	Transcription factor. Interacts specifically with the W box (5'-(T)TGAC[CT]-3'), a frequently occurring elicitor-responsive cis-acting element (By similarity). {ECO:0000250}.
Lu11_6337683	Lus10016688	6307984	6313654	+	PP160_ARATH	At2g17525 MJB20.17	Pentatricopeptide repeat-containing protein At2g17525, mitochondrial	Mitochondrion {ECO:0000305}.	ath:AT2G17525
	Lus10016689	6314051	6326082	-	EHD2_ARATH	EHD2 At4g05520 T1J24.10	EH domain-containing protein 2 (AtEHD2) (EC 3.6.5.2)	Endosome membrane {ECO:0000250|UniProtKB:Q641Z6}; Peripheral membrane protein {ECO:0000250|UniProtKB:Q641Z6}. Cell membrane {ECO:0000269|PubMed:18547399, ECO:0000269|PubMed:19936242}; Peripheral membrane protein {ECO:0000269|PubMed:18547399, ECO:0000269|PubMed:19936242}; Cytoplasmic side {ECO:0000250|UniProtKB:Q9WVK4}. Nucleus {ECO:0000255|PROSITE-ProRule:PRU00768, ECO:0000269|PubMed:18547399, EC…	ath:AT4G05520	Involved in endocytosis negative regulation, probably by influencing actin organization. Acts in early endocytic membrane fusion and membrane trafficking of recycling endosomes. Exhibits an inhibitory effect on endocytosis when over-expressed. {ECO:0000269|PubMed:18547399, ECO:0000269|PubMed:19936242}.	endocytosis [GO:0006897]; endosomal transport [GO:0016197]; protein homooligomerization [GO:0051260]; regulation of actin cytoskeleton organization [GO:0032956]
	Lus10016690	6328493	6330155	+	AFC3_ARATH	AFC3 AME3 At4g32660 F4D11.140	Serine/threonine-protein kinase AFC3 (EC 2.7.12.1)		ath:AT4G32660		protein autophosphorylation [GO:0046777]
	Lus10016691	6330816	6337982	+	MLH3_ARATH	MLH3 At4g35520 F8D20.30	DNA mismatch repair protein MLH3 (MutL protein homolog 3)	Nucleus {ECO:0000269|PubMed:16467846, ECO:0000269|PubMed:16856855}.	ath:AT4G35520	Involved in DNA mismatch repair (MMR), correcting insertion-deletion loops (IDLs) resulting from DNA replication, DNA damage or from recombination events between non-identical sequences during meiosis. Component of the MutLbeta heterodimer, which probably forms a ternary complex with the MutSbeta heterodimer that initially recognizes the DNA mismatches. This complex is thought to be responsible f…	mismatch repair [GO:0006298]; reciprocal meiotic recombination [GO:0007131]
	Lus10016692	6338474	6340654	-	BPG2_ARATH	BPG2 At3g57180 F28O9.30	GTP-binding protein BRASSINAZOLE INSENSITIVE PALE GREEN 2, chloroplastic (Protein BRZ-INSENSITIVE-PALE GREEN 2)	Plastid, chloroplast stroma {ECO:0000269|PubMed:19919572, ECO:0000269|PubMed:22526496}.	ath:AT3G57180	Required for brassinosteroid- (BR) mediated post-transcriptional and translational regulation in the chloroplast, including accumulation of chloroplast rRNA (PubMed:19919572). Involved in chloroplast differentiation (PubMed:19919572, PubMed:22526496). {ECO:0000269|PubMed:19919572, ECO:0000269|PubMed:22526496}.	brassinosteroid mediated signaling pathway [GO:0009742]; chloroplast organization [GO:0009658]; chloroplast rRNA processing [GO:1901259]; developmental process [GO:0032502]; positive regulation of carotenoid biosynthetic process [GO:1904143]; positive regulation of chlorophyll biosynthetic process [GO:1902326]; regulation of transcription, DNA-templated [GO:0006355]; response to absence of light …
	Lus10016693	6341213	6343870	-
	Lus10016694	6347013	6347888	+
	Lus10016695	6356722	6358264	-	HMGB2_ARATH	HMGB2 HMGB1 HMGBETA1 NFD02 NFD2 At1g20693 F2D10.18	High mobility group B protein 2 (High mobility group protein B 1) (AtHMGbeta1) (HMG beta 1) (Nucleosome/chromatin assembly factor group D 02) (Nucleosome/chromatin assembly factor group D 2)	Nucleus {ECO:0000255|PROSITE-ProRule:PRU00267, ECO:0000269|PubMed:20123078}. Cytoplasm, cytosol {ECO:0000269|PubMed:20123078}.	ath:AT1G20693	Binds preferentially double-stranded DNA. Confers sensitivity to salt and drought stresses. {ECO:0000269|PubMed:17169924, ECO:0000269|PubMed:9461286}.	chromatin assembly or disassembly [GO:0006333]
	Lus10016696	6360844	6362618	+	GET1_ARATH	GET1 At4g16444	Protein GET1 (AtGET1) (Guided entry of tail-anchored proteins 1 homolog)	Endoplasmic reticulum membrane {ECO:0000269|PubMed:28096354}.	ath:AT4G16444	Required for the post-translational delivery of tail-anchored (TA) proteins to the endoplasmic reticulum. Acts as a membrane receptor for soluble GET3, which recognizes and selectively binds the transmembrane domain of TA proteins in the cytosol (By similarity). Involved in the control of root hair growth through the regulation of syntaxin SYP123 expression (PubMed:28096354). {ECO:0000250|UniProt…	root hair elongation [GO:0048767]; tail-anchored membrane protein insertion into ER membrane [GO:0071816]
Lu12_1284743	Lus10036229	1255391	1257685	+	CCT1_ARATH	CCT1 CCT At2g32260 T32F6.22	Choline-phosphate cytidylyltransferase 1 (AtCCT1) (EC 2.7.7.15) (CTP:phosphocholine cytidylyltransferase 1) (Phosphorylcholine transferase 1)		ath:AT2G32260	Plays an important role in the biosynthesis of the phospholipid phosphatidylcholine. Catalyzes the formation of CDP-choline. {ECO:0000269|PubMed:19667100}.	phosphatidylcholine biosynthetic process [GO:0006656]
	Lus10036230	1258286	1260557	-	QRT3_ARATH	QRT3 At4g20050 F18F4.150	Polygalacturonase QRT3 (AtQRT3) (PG QRT3) (EC 3.2.1.15) (Pectinase QRT3) (Protein QUARTET 3)	Secreted, cell wall {ECO:0000269|PubMed:14551328}.	ath:AT4G20050	Polygalacturonase required for degrading the pollen mother cell wall during microspore development. {ECO:0000269|PubMed:14551328}.	cell wall organization [GO:0071555]; metabolic process [GO:0008152]; microsporogenesis [GO:0009556]; pollen exine formation [GO:0010584]
	Lus10036231	1263461	1265882	-	QRT3_ARATH	QRT3 At4g20050 F18F4.150	Polygalacturonase QRT3 (AtQRT3) (PG QRT3) (EC 3.2.1.15) (Pectinase QRT3) (Protein QUARTET 3)	Secreted, cell wall {ECO:0000269|PubMed:14551328}.	ath:AT4G20050	Polygalacturonase required for degrading the pollen mother cell wall during microspore development. {ECO:0000269|PubMed:14551328}.	cell wall organization [GO:0071555]; metabolic process [GO:0008152]; microsporogenesis [GO:0009556]; pollen exine formation [GO:0010584]
	Lus10036232	1275286	1279735	-
	Lus10036233	1282940	1285741	+	AAH2_SOYBN	AAH2 Glyma09g05600	Allantoate deiminase 2 (EC 3.5.3.9) (Allantoate amidohydrolase 2) (GmAAH2)	Endoplasmic reticulum {ECO:0000250|UniProtKB:C0M0V4}.		Involved in the catabolism of purine nucleotides. Can use allantoate as substrate. The sequential activity of AAH, UGLYAH and UAH allows a complete purine breakdown without the intermediate generation of urea. {ECO:0000269|PubMed:23940254}.	purine nucleobase metabolic process [GO:0006144]
	Lus10036234	1287335	1290577	+	SUF4_ARATH	SUF4 At1g30970 F17F8.14	Protein SUPPRESSOR OF FRI 4	Nucleus {ECO:0000269|PubMed:17079264, ECO:0000269|PubMed:17138694, ECO:0000269|PubMed:24451981}.	ath:AT1G30970	Sequence-specific DNA binding factor that recognizes the 5'-CCAAATTTTAAGTTT-3' sequence. Recruits the FRI-C complex to the FLC promoter. Required for FRI-mediated FLC activation, but has no effect on the expression of MAF1, MAF2, MAF3, MAF5, UFC and CO. Dispensable for the reactivation of FLC in early embryogenesis, but required to maintain high levels of FLC expression in later embryonic and veg…	cell differentiation [GO:0030154]; flower development [GO:0009908]; negative regulation of flower development [GO:0009910]; regulation of transcription, DNA-templated [GO:0006355]
	Lus10036235	1291125	1292349	+	BIP4_TOBAC	BIP4	Luminal-binding protein 4 (BiP 4) (78 kDa glucose-regulated protein homolog 4) (GRP-78-4)	Endoplasmic reticulum lumen.	nta:107818867	Probably plays a role in facilitating the assembly of multimeric protein complexes inside the ER.	cellular response to unfolded protein [GO:0034620]; chaperone cofactor-dependent protein refolding [GO:0051085]; endoplasmic reticulum unfolded protein response [GO:0030968]; protein refolding [GO:0042026]; ubiquitin-dependent ERAD pathway [GO:0030433]
	Lus10036236	1292405	1293997	+	UTP18_ARATH	At5g14050 MUA22.5	U3 small nucleolar RNA-associated protein 18 homolog	Nucleus, nucleolus {ECO:0000250}.	ath:AT5G14050	Involved in nucleolar processing of pre-18S ribosomal RNA. {ECO:0000250}.	rRNA processing [GO:0006364]
	Lus10036237	1295216	1299080	+	POLH_ARATH	POLH RAD30 At5g44740 K23L20.8 T19K24.15	DNA polymerase eta (EC 2.7.7.7) (Radiation-sensitive protein 30) (AtRAD30) (Y-family DNA polymerase H) (AtPOLH)	Nucleus {ECO:0000250}. Note=Accumulates at replication forks after DNA damage. {ECO:0000250}.	ath:AT5G44740	Error-free DNA polymerase specifically involved in DNA repair. Plays an important role in translesion synthesis (TLS), where the normal high fidelity DNA polymerases cannot proceed and DNA synthesis stalls. Plays an important role in the repair of UV-induced pyrimidine dimers and confers resistance to ultraviolet light. Depending on the context, it inserts the correct base, but may cause base tra…	DNA replication [GO:0006260]; error-prone translesion synthesis [GO:0042276]; response to radiation [GO:0009314]; response to UV-B [GO:0010224]; UV protection [GO:0009650]
	Lus10036238	1299796	1301802	-	PP327_ARATH	EMB1025 At4g20090 F18F4.190	Pentatricopeptide repeat-containing protein At4g20090 (Protein EMBRYO DEFECTIVE 1025)		ath:AT4G20090	May play a role in embryogenesis. {ECO:0000269|PubMed:15647901}.	embryo development ending in seed dormancy [GO:0009793]
	Lus10036239	1302471	1303832	-	LIP2_ARATH	LIP2 At5g14180 MUA22.18 MUA22.19	Triacylglycerol lipase 2 (EC 3.1.1.3)	Secreted {ECO:0000305}.	ath:AT5G14180	Triacylglycerol (TAG) lipase. May be involved for TAG storage breakdown during seed germination (By similarity). {ECO:0000250}.	defense response to insect [GO:0002213]; lipid catabolic process [GO:0016042]
	Lus10036240	1305828	1310217	-
Lu12_3147588	Lus10015269	3176944	3177288	+
	Lus10015270	3172079	3173134	-	WIN2_SOLTU	WIN2	Wound-induced protein WIN2		sot:102581743		defense response to bacterium [GO:0042742]; defense response to fungus [GO:0050832]
	Lus10015271	3169266	3169865	+	AGL61_ARATH	AGL61 DIA At2g24840 F27C12.24	Agamous-like MADS-box protein AGL61 (Protein DIANA)	Nucleus {ECO:0000255|PROSITE-ProRule:PRU00251, ECO:0000269|PubMed:18599653}. Note=The transport to the nucleus is dependent on dimerization with AGL80.	ath:AT2G24840	Probable transcription factor. Controls central cell differentiation during female gametophyte development. {ECO:0000269|PubMed:18599653, ECO:0000269|PubMed:18713950}.	embryo sac central cell differentiation [GO:0009559]; positive regulation of transcription by RNA polymerase II [GO:0045944]; regulation of transcription by RNA polymerase II [GO:0006357]
	Lus10015272	3166639	3167862	+
	Lus10015273	3161879	3163339	+
	Lus10015274	3157012	3159547	+	KSG7_ARATH	ASK7 BIN2 DWF12 SK21 UCU1 At4g18710 F28A21.120	Shaggy-related protein kinase eta (EC 2.7.11.1) (ASK-eta) (Protein BRASSINOSTEROID INSENSITIVE 2) (Protein ULTRACURVATA 1) (Shaggy-related protein kinase 21) (AtSK21)	Cytoplasm, cell cortex {ECO:0000269|PubMed:30429609}. Cytoplasm {ECO:0000269|PubMed:28652362, ECO:0000269|PubMed:30429609}. Nucleus {ECO:0000269|PubMed:28652362, ECO:0000269|PubMed:30429609}. Cell membrane {ECO:0000269|PubMed:28652362, ECO:0000269|PubMed:30429609}; Peripheral membrane protein {ECO:0000305}; Cytoplasmic side {ECO:0000305}. Note=Spotty cytoplasmic as well as nuclear localization (P…	ath:AT4G18710	Negative regulator in brassinosteroid signal transduction pathway important for plant growth. May be also involved in auxin signaling pathway. Phosphorylates and increases the degradation of BZR1 and BZR2/BES1 by the proteasome. Phosphorylates BHLH150, beet curly top virus C4 and tomato golden mosaic virus AC4 on threonine and serine residues. Upon brassinosteroid signaling, inhibits stomatal dev…	brassinosteroid mediated signaling pathway [GO:0009742]; detection of brassinosteroid stimulus [GO:0009729]; leaf morphogenesis [GO:0009965]; multidimensional cell growth [GO:0009825]; negative regulation of brassinosteroid mediated signaling pathway [GO:1900458]; positive regulation of protein export from nucleus [GO:0046827]; protein autophosphorylation [GO:0046777]; protein phosphorylation [GO…
	Lus10015275	3146090	3147637	-	CIPKC_ARATH	CIPK12 PKS8 SnRK3.9 At4g18700 F28A21.110	CBL-interacting serine/threonine-protein kinase 12 (EC 2.7.11.1) (SNF1-related kinase 3.9) (SOS2-like protein kinase PKS8)		ath:AT4G18700	CIPK serine-threonine protein kinases interact with CBL proteins. Binding of a CBL protein to the regulatory NAF domain of CIPK protein lead to the activation of the kinase in a calcium-dependent manner (By similarity). {ECO:0000250}.	signal transduction [GO:0007165]
	Lus10015276	3140350	3142048	+	DOGL3_ARATH	DOGL3 At4g18690 F28A21.100	Protein DOG1-like 3		ath:AT4G18690		transcription, DNA-templated [GO:0006351]
	Lus10015277	3133318	3136716	+	MDIS1_ARATH	MDIS1 At5g45840 K15I22.4	Protein MALE DISCOVERER 1 (AtMDIS1) (Probable LRR receptor-like serine/threonine-protein kinase At5g45840) (EC 2.7.11.1)	Cell membrane {ECO:0000269|PubMed:26863186}; Single-pass type I membrane protein {ECO:0000305}. Endomembrane system {ECO:0000269|PubMed:26863186}. Note=LURE1.2 binding triggers endocytosis in the pollen tube tip. {ECO:0000269|PubMed:26863186}.		Involved in the pollen tube perception of the female signal. {ECO:0000269|PubMed:26863186}.
	Lus10015278	3130191	3130608	-	NLTP1_GOSHI		Non-specific lipid-transfer protein (LTP)			Plant non-specific lipid-transfer proteins transfer phospholipids as well as galactolipids across membranes. May play a role in wax or cutin deposition in the cell walls of expanding epidermal cells and certain secretory tissues (By similarity). {ECO:0000250}.	lipid transport [GO:0006869]
	Lus10015279	3127165	3127512	-	NLTP2_GOSHI		Non-specific lipid-transfer protein (LTP) (GH3)			Plant non-specific lipid-transfer proteins transfer phospholipids as well as galactolipids across membranes. May play a role in wax or cutin deposition in the cell walls of expanding epidermal cells and certain secretory tissues.	lipid transport [GO:0006869]; seed trichome elongation [GO:0090378]
	Lus10015280	3121813	3124029	+
Lu12_3248052	Lus10015250	3275126	3275854	+
	Lus10015251	3272549	3274122	-	IF4E1_ARAHY	eIF4E Ahy_B10g100505	Eukaryotic translation initiation factor 4E-1 (PeaeIF4E) (eIF-4E-1) (eIF-4F 25 kDa subunit) (eIF-4F p26 subunit) (mRNA cap-binding protein)	Nucleus {ECO:0000269|PubMed:28344571}. Cytoplasm {ECO:0000269|PubMed:28344571}.		Component of the protein complex eIF4F, which is involved in the recognition of the mRNA cap, ATP-dependent unwinding of 5'-terminal secondary structure and recruitment of mRNA to the ribosome (By similarity). Recognizes and binds the 7-methylguanosine-containing mRNA cap during an early step in the initiation of protein synthesis and facilitates ribosome binding by inducing the unwinding of the …	defense response to virus [GO:0051607]
	Lus10015252	3267108	3269979	-	SRG1_ARATH	SRG1 At1g17020 F20D23.28 F6I1.30	Protein SRG1 (AtSRG1) (Protein SENESCENCE-RELATED GENE 1)		ath:AT1G17020		leaf senescence [GO:0010150]
	Lus10015253	3260600	3262512	+	SH3P3_ARATH	SH3P3 At4g18060 F15J5.30	SH3 domain-containing protein 3 (AtSH3P3)	Cytoplasmic vesicle, clathrin-coated vesicle {ECO:0000269|PubMed:11701884, ECO:0000269|PubMed:12207647}.	ath:AT4G18060	May be involved in the recruitment of DRP2A to the accessory protein complex and in the negative regulation of its GTPase activity. {ECO:0000305|PubMed:12207647}.
	Lus10015254	3257218	3258729	-
	Lus10015255	3255040	3256123	+	PM19L_ORYSJ	PM19L PM1 Os05g0381400 LOC_Os05g31670 OSJNBa0088M05.8	Membrane protein PM19L (PM19-like protein 1) (OsPM19L1)	Membrane {ECO:0000305|PubMed:26505346}; Multi-pass membrane protein {ECO:0000255}.	osa:4338635	May be involved in abiotic stress response through abscisic acid-dependent signaling. {ECO:0000305|PubMed:26505346}.
	Lus10015256	3251923	3253953	-	PP419_ARATH	PCMP-H49 At5g46460 K11I1.5	Pentatricopeptide repeat-containing protein At5g46460, mitochondrial	Mitochondrion {ECO:0000305}.	ath:AT5G46460
	Lus10015257	3243148	3247943	+	PR39A_ARATH	PRP39-1 PRP39a At1g04080 F20D22.14	Pre-mRNA-processing factor 39-1 (AtPRP39-1) (PRP39 homolog A) (Pre-mRNA-processing factor 39a)	Nucleus {ECO:0000250|UniProtKB:P39682}.		Involved in pre-mRNA splicing (PubMed:28971960). Involved in the determination of flowering time probably via the modulation of flowering associated genes (e.g. FLC, FT and SOC1) expression (PubMed:17380304). {ECO:0000269|PubMed:17380304, ECO:0000269|PubMed:28971960}.	RNA processing [GO:0006396]
	Lus10015258	3239842	3241260	-	CRIM2_ARATH	COR413IM2 COR314TM2 COR413TM2 At1g29390 F15D2.42	Cold-regulated 413 inner membrane protein 2, chloroplastic (AtCOR413-IM2) (Cold-regulated 413 thylakoid membrane 2) (AtCOR413-TM2)	Plastid, chloroplast inner membrane {ECO:0000269|PubMed:18431481, ECO:0000269|PubMed:18643950}; Multi-pass membrane protein {ECO:0000269|PubMed:18431481, ECO:0000269|PubMed:18643950}.	ath:AT1G29390		cellular response to cold [GO:0070417]; cold acclimation [GO:0009631]
	Lus10015259	3237966	3239148	+	E13B_WHEAT	GLC1	Glucan endo-1,3-beta-glucosidase (EC 3.2.1.39) ((1->3)-beta-glucan endohydrolase) ((1->3)-beta-glucanase) (Beta-1,3-endoglucanase)			Is thought to be an important plant defense-related product against fungal pathogens.	carbohydrate metabolic process [GO:0005975]; defense response [GO:0006952]
	Lus10015260	3230381	3234797	-	JMJ25_ARATH	JMJ25 IBM1 At3g07610 MLP3.6	Lysine-specific demethylase JMJ25 (EC 1.14.11.65) (Jumonji domain-containing protein 25) (Lysine-specific histone demethylase JMJ25) (Protein INCREASE IN BONSAI METHYLATION 1) (Protein JUMONJI 25) ([histone H3]-dimethyl-L-lysine(9) demethylase JMJ25)	Nucleus {ECO:0000269|PubMed:20834229, ECO:0000269|PubMed:22772985}.	ath:AT3G07610	Histone demethylase that demethylates 'Lys-9' (H3K9me) of histone H3 with a specific activity for H3K9me2 and H3K9me1. No activity on H3K9me3, H3K4me3/2/1, H3K27me3/2/1 and H3K36me3/2/1. Involved in the control of several developmental processes by protecting genes from silencing. Demethylates H3K9me2 in the promoter regions of RDR2 and DCL3 and mediates the repression of ectopic non-CpG methylat…	chromatin organization [GO:0006325]; histone H3-K9 demethylation [GO:0033169]; negative regulation of gene silencing [GO:0060969]; regulation of transcription by RNA polymerase II [GO:0006357]
	Lus10015261	3227959	3228336	-
	Lus10015262	3222320	3226717	-
	Lus10015263	3221434	3221775	+	COPZ1_ARATH	At1g60970 T7P1.11	Coatomer subunit zeta-1 (Zeta-1-coat protein) (Zeta-COP 1)	Cytoplasm {ECO:0000250}. Golgi apparatus membrane {ECO:0000250}; Peripheral membrane protein {ECO:0000250}; Cytoplasmic side {ECO:0000250}. Cytoplasmic vesicle, COPI-coated vesicle membrane {ECO:0000250}; Peripheral membrane protein {ECO:0000250}; Cytoplasmic side {ECO:0000250}. Note=The coatomer is cytoplasmic or polymerized on the cytoplasmic side of the Golgi, as well as on the vesicles/buds o…	ath:AT1G60970	The coatomer is a cytosolic protein complex that binds to dilysine motifs and reversibly associates with Golgi non-clathrin-coated vesicles, which further mediate biosynthetic protein transport from the ER, via the Golgi up to the trans Golgi network. Coatomer complex is required for budding from Golgi membranes, and is essential for the retrograde Golgi-to-ER transport of dilysine-tagged protein…	intracellular protein transport [GO:0006886]; intra-Golgi vesicle-mediated transport [GO:0006891]; retrograde vesicle-mediated transport, Golgi to endoplasmic reticulum [GO:0006890]
Lu12_3841469	Lus10005856	3810366	3814485	+	TFB2_ARATH	TFB2 GTF2H4 At4g17020 dl4540c	General transcription and DNA repair factor IIH subunit TFB2 (AtTFB2) (TFIIH subunit TFB2) (RNA polymerase II transcription factor B subunit 2)	Nucleus {ECO:0000305}.	ath:AT4G17020	Component of the general transcription and DNA repair factor IIH (TFIIH) core complex, which is involved in general and transcription-coupled nucleotide excision repair (NER) of damaged DNA and, when complexed to CAK, in RNA transcription by RNA polymerase II. In NER, TFIIH acts by opening DNA around the lesion to allow the excision of the damaged oligonucleotide and its replacement by a new DNA …	nucleotide-excision repair [GO:0006289]; phosphorylation of RNA polymerase II C-terminal domain [GO:0070816]
	Lus10005857	3814955	3819381	+	WAPL1_ARATH	WAPL1 At1g11060 T19D16.5	Wings apart-like protein 1 (AtWAPL1)	Nucleus {ECO:0000250|UniProtKB:Q7Z5K2}. Chromosome {ECO:0000250|UniProtKB:Q7Z5K2}.	ath:AT1G11060	Regulator of sister chromatid cohesion in meiosis which negatively regulates cohesin association with chromatin, acting as an antagonist of CTF7 (PubMed:25033056, PubMed:26813623). Cohesion ensures that chromosome partitioning is accurate in both meiotic and mitotic cells and plays an important role in DNA repair (By similarity). Essential for the prophase removal of cohesin during meiosis thus d…	cell division [GO:0051301]; embryo development ending in seed dormancy [GO:0009793]; meiotic centromere clustering [GO:1990571]; meiotic chromosome segregation [GO:0045132]; meiotic sister chromatid cohesion involved in meiosis I [GO:0010789]; meiotic sister chromatid segregation [GO:0045144]; meiotic spindle assembly [GO:0090306]; mitotic sister chromatid segregation [GO:0000070]; regulation of …
	Lus10005858	3821908	3823983	+	D14_ARATH	D14 At3g03990 T11I18.10	Strigolactone esterase D14 (EC 3.1.-.-) (Protein DWARF 14) (AtD14)	Cytoplasm {ECO:0000269|PubMed:24610723}. Nucleus {ECO:0000269|PubMed:24610723}.	ath:AT3G03990	Involved in strigolactone signaling pathway (PubMed:22357928). Does not move long distances acropetally in the plant to regulate shoot branching and is rapidly degraded in the presence of strigolactones (PubMed:24610723). Functions downstream of strigolactone synthesis, as a component of hormone signaling and as an enzyme that participates in the conversion of strigolactones to the bioactive form…	cellular response to strigolactone [GO:1902348]; secondary shoot formation [GO:0010223]; strigolactone biosynthetic process [GO:1901601]
	Lus10005859	3825655	3826711	+	AIRP2_ARATH	AIRP2 At5g01520 F7A7_40	E3 ubiquitin-protein ligase AIRP2 (EC 2.3.2.27) (Protein ABA INSENSITIVE RING PROTEIN 2) (AtAIRP2) (RING-type E3 ubiquitin transferase AIRP2)	Cytoplasm, cytosol {ECO:0000269|PubMed:21969385}.	ath:AT5G01520	Possesses E3 ubiquitin-protein ligase activity in vitro when associated with the E2 enzyme UBC8 in vitro (PubMed:21969385, PubMed:28626006). Plays combinatory roles with AIRP1 in the positive regulation of the abscisic acid-mediated drought stress response (PubMed:21969385). Plays a positive role in abscisic acid- and high salinity-regulated seed germination through the ubiquitin-proteasome-depen…	positive regulation of abscisic acid-activated signaling pathway [GO:0009789]; protein ubiquitination [GO:0016567]; response to abscisic acid [GO:0009737]; response to salt stress [GO:0009651]; ubiquitin-dependent protein catabolic process [GO:0006511]
	Lus10005860	3826851	3828631	-	NPC1_ARATH	NPC1 At1g07230 F10K1.6	Non-specific phospholipase C1 (EC 3.1.-.-)	Secreted {ECO:0000305}.	ath:AT1G07230		phospholipid catabolic process [GO:0009395]
	Lus10005861	3829260	3835253	-	VILI1_ARATH	VLN1 At2g29890 F6K5.2 T27A16.1	Villin-1	Cytoplasm, cytoskeleton {ECO:0000269|PubMed:10631247}.	ath:AT2G29890	Binds actin and actin filament bundles in a Ca(2+)/calmodulin-insensitive manner, but is unable to sever, cap, and nucleate actin filament formation in vitro. Does not protect individual filaments from severing by VLN3 (AC O81645). {ECO:0000269|PubMed:10631247, ECO:0000269|PubMed:15659626, ECO:0000269|PubMed:20807878}.	actin filament capping [GO:0051693]; actin filament severing [GO:0051014]; cytoskeleton organization [GO:0007010]
	Lus10005862	3836483	3837119	-	FQRL3_ARATH	At5g58800 MZN1.26	Probable NAD(P)H dehydrogenase (quinone) FQR1-like 3 (EC 1.6.5.2)		ath:AT5G58800	Catalyzes the transfer of electrons from NADH and NADPH to reduce quinone to the hydroquinone state. {ECO:0000250|UniProtKB:Q9LSQ5}.
	Lus10005863	3841191	3842956	+
	Lus10005864	3846426	3849099	+	MY119_ARATH	MYB119 At5g58850 K19M22.5	Transcription factor MYB119 (Myb-related protein 119) (AtMYB119)	Nucleus {ECO:0000255|PROSITE-ProRule:PRU00625, ECO:0000269|PubMed:24068955}.	ath:AT5G58850	Transcription factor required for female gametophyte fertility. Acts redundantly with MYB64 to initiate the FG5 transition during female gametophyte development. The FG5 transition represents the switch between free nuclear divisions and cellularization-differentiation in female gametophyte, and occurs during developmental stage FG5. {ECO:0000269|PubMed:24068955}.	regulation of transcription, DNA-templated [GO:0006355]
	Lus10005865	3850556	3852462	-	GONS2_ARATH	GONST2 At1g07290 F22G5.37	GDP-mannose transporter GONST2 (Protein GOLGI NUCLEOTIDE SUGAR TRANSPORTER 2)	Golgi apparatus membrane {ECO:0000269|PubMed:27381418}; Multi-pass membrane protein {ECO:0000255}.		GDP-mannose transporter that may be involved in the import of GDP-mannose from the cytoplasm into the Golgi lumen. {ECO:0000269|PubMed:15480787}.	carbohydrate transport [GO:0008643]; GDP-mannose transmembrane transport [GO:1990570]; nucleotide-sugar transmembrane transport [GO:0015780]
	Lus10005866	3854186	3854479	+
	Lus10005867	3857536	3858489	-	SRC2_ARATH	SRC2 At1g09070 F7G19.6	Protein SRC2 homolog (AtSRC2)	Endoplasmic reticulum membrane {ECO:0000269|PubMed:16227454}; Single-pass type II membrane protein {ECO:0000255}. Protein storage vacuole membrane {ECO:0000269|PubMed:16227454}; Single-pass type II membrane protein {ECO:0000255}. Cell membrane {ECO:0000305|PubMed:23872431}; Single-pass type II membrane protein {ECO:0000255}. Note=Binds to C-terminal sequence of alpha-TIP and moves from the ER to …	ath:AT1G09070	May act as an activator of the calcium-dependent activation of RBOHF that mediates reactive oxygen species (ROS) production and may play a role in cold responses. {ECO:0000269|PubMed:23872431}.	cellular response to hypoxia [GO:0071456]; defense response [GO:0006952]; protein targeting to vacuole [GO:0006623]
	Lus10005868	3859305	3863796	-	FTSH9_ARATH	FTSH9 At5g58870 K19M22.7	ATP-dependent zinc metalloprotease FTSH 9, chloroplastic (AtFTSH9) (EC 3.4.24.-)	Plastid, chloroplast thylakoid membrane {ECO:0000269|PubMed:14630971}; Multi-pass membrane protein {ECO:0000269|PubMed:14630971}; Stromal side {ECO:0000269|PubMed:14630971}.	ath:AT5G58870	Probable ATP-dependent zinc metallopeptidase.	proteolysis [GO:0006508]
	Lus10005869	3864693	3868652	+
Lu12_5344617	Lus10018326	5315885	5317372	-	PPDEX_ARATH	At4g17486 dl4780c FCAALL.234	DeSI-like protein At4g17486 (EC 3.4.-.-)		ath:AT4G17486		protein deubiquitination [GO:0016579]; protein modification by small protein removal [GO:0070646]
	Lus10018327	5319582	5320452	+	YB95_ARATH	At2g39795 T5I7.20	Uncharacterized protein At2g39795, mitochondrial	Mitochondrion matrix {ECO:0000269|PubMed:14671022, ECO:0000305|PubMed:25732537}.	ath:AT2G39795
	Lus10018328	5322181	5322720	-	ZFP3_ARATH	ZFP3 At5g25160 F21J6.6	Zinc finger protein 3	Nucleus {ECO:0000250|UniProtKB:Q39261}.	ath:AT5G25160	Acts as negative regulator of abscisic acid (ABA) signaling during germination and early seedling development. Involved in the regulation of vegetative development and fertility. Modulates red light signaling in seedling photomorphogenesis. {ECO:0000269|PubMed:24808098}.	abscisic acid-activated signaling pathway [GO:0009738]; negative regulation of abscisic acid-activated signaling pathway [GO:0009788]; regulation of transcription, DNA-templated [GO:0006355]
	Lus10018329	5330110	5331547	+	CHIT5_LOTJA	CHIT5	Class V chitinase CHIT5 (LjCHIT5) (EC 3.2.1.14)			Possesses chitinase activity in vitro toward glycol chitin, carboxymethyl-chitin, colloidal chitin, and the chitin oligosaccharides (N-acetylglucosamine) (GlcNAc)6 and (GlcNAc)5 (PubMed:27383628). Hydrolyzes (GlcNAc)6 into (GlcNAc)4 and (GlcNAc)2, or two (GlcNAc)3 molecules (PubMed:27383628). Has the capacity to inhibit hyphal growth of the fungus Trichoderma viride in an agar-plate bioassay (Pub…	chitin catabolic process [GO:0006032]; defense response to fungus [GO:0050832]; nodulation [GO:0009877]; polysaccharide catabolic process [GO:0000272]
	Lus10018330	5334435	5335268	-	CAF1G_ARATH	CAF1-7 At2g32070 F22D22.18	Probable CCR4-associated factor 1 homolog 7 (EC 3.1.13.4)	Nucleus {ECO:0000250}. Cytoplasm {ECO:0000250}.	ath:AT2G32070	Ubiquitous transcription factor required for a diverse set of processes. It is a component of the CCR4 complex involved in the control of gene expression (By similarity). {ECO:0000250}.	exonucleolytic catabolism of deadenylated mRNA [GO:0043928]
	Lus10018331	5335305	5337505	-	SYWC_ARATH	At3g04600 F7O18.7	Tryptophan--tRNA ligase, cytoplasmic (EC 6.1.1.2) (Tryptophanyl-tRNA synthetase) (TrpRS)	Cytoplasm, cytosol {ECO:0000305|PubMed:16251277, ECO:0000305|PubMed:16297076}.	ath:AT3G04600		tryptophanyl-tRNA aminoacylation [GO:0006436]
	Lus10018332	5341579	5347070	+	PDS5C_ARATH	PDS5C At4g31880 F11C18.80	Sister chromatid cohesion protein PDS5 homolog C (Precocious dissociation of sisters protein 5-C) (AtPDS5C)	Nucleus {ECO:0000250|UniProtKB:Q29RF7}.		Cohesin cofactor dispensable during the meiotic division but playing an important role in DNA repair by homologous recombination (HR) probably by helping SMC5/SMC6 complex (PubMed:26648949). Regulator of sister chromatid cohesion in mitosis which may stabilize cohesin complex association with chromatin (PubMed:26648949). May couple sister chromatid cohesion during mitosis to DNA replication (By s…	cell division [GO:0051301]; DNA recombination [GO:0006310]; DNA repair [GO:0006281]; homologous recombination [GO:0035825]; microsporogenesis [GO:0009556]; mitotic sister chromatid cohesion [GO:0007064]
	Lus10018333	5348022	5349710	+	GCR1_ARATH	GCR1 At1g48270 F11A17.17	G-protein coupled receptor 1	Cell membrane {ECO:0000269|PubMed:15181210, ECO:0000269|Ref.7}; Multi-pass membrane protein {ECO:0000269|PubMed:15181210, ECO:0000269|Ref.7}. Note=Localized to the outer edge of the leaf epidermal cells in a punctuate pattern.	ath:AT1G48270	Together with GPA1, may regulate the cell cycle via a signaling cascade that uses phosphatidylinositol-specific phospholipase C (PI-PLC) as an effector and inositol 1,4,5-trisphosphate(IP(3)) as a second messenger. Promotes PI-PLC activity and IP(3) accumulation. Involved in the blue light (BL) signaling. Together with GPA1 and ADT3, required for BL-mediated synthesis of phenylpyruvate and subseq…	abscisic acid-activated signaling pathway [GO:0009738]; activation of phospholipase C activity [GO:0007202]; adenylate cyclase-activating G protein-coupled receptor signaling pathway [GO:0007189]; blue light signaling pathway [GO:0009785]; brassinosteroid mediated signaling pathway [GO:0009742]; cell surface receptor signaling pathway [GO:0007166]; cytokinin-activated signaling pathway [GO:000973…
	Lus10018334	5355693	5360145	+	CIPK1_ARATH	CIPK1 PKS13 SnRK3.16 At3g17510 MKP6.6	CBL-interacting serine/threonine-protein kinase 1 (EC 2.7.11.1) (SNF1-related kinase 3.16) (SOS2-like protein kinase PKS13)		ath:AT3G17510	CIPK serine-threonine protein kinases interact with CBL proteins. Binding of a CBL protein to the regulatory NAF domain of CIPK protein lead to the activation of the kinase in a calcium-dependent manner. {ECO:0000269|PubMed:22253446}.	intracellular signal transduction [GO:0035556]; protein phosphorylation [GO:0006468]; response to abscisic acid [GO:0009737]; response to osmotic stress [GO:0006970]; response to salt stress [GO:0009651]
	Lus10018335	5363020	5366107	-	PME21_ARATH	PME21 ARATH21 At3g05610 F18C1.12	Probable pectinesterase/pectinesterase inhibitor 21 [Includes: Pectinesterase inhibitor 21 (Pectin methylesterase inhibitor 21); Pectinesterase 21 (PE 21) (EC 3.1.1.11) (Pectin methylesterase 21) (AtPME21)]	Membrane {ECO:0000305}; Single-pass membrane protein {ECO:0000305}.	ath:AT3G05610	Acts in the modification of cell walls via demethylesterification of cell wall pectin. {ECO:0000250}.	cell wall modification [GO:0042545]; pectin catabolic process [GO:0045490]
	Lus10018337	5370619	5372596	-	PDK_ARATH	PDK PDHK YA5 At3g06483 F24P17.1 F5E6.19	[Pyruvate dehydrogenase (acetyl-transferring)] kinase, mitochondrial (AtPDHK) (Pyruvate dehydrogenase kinase) (EC 2.7.11.2)	Mitochondrion {ECO:0000250}.	ath:AT3G06483	Serine protein kinase that inhibits the mitochondrial pyruvate dehydrogenase (PDH) complex (mtPDC) by phosphorylation of the E1 alpha subunit on Ser residues, thus contributing to the regulation of glucose metabolism. {ECO:0000269|PubMed:10631090, ECO:0000269|PubMed:10737148, ECO:0000269|PubMed:10861228, ECO:0000269|PubMed:12493853}.	protein autophosphorylation [GO:0046777]; protein phosphorylation [GO:0006468]; regulation of glucose metabolic process [GO:0010906]
Lu13_10606707	Lus10032829	10581886	10591491	+	GWD2_ARATH	GWD2 At4g24450 T22A6.280	Alpha-glucan water dikinase 2 (EC 2.7.9.4)		ath:AT4G24450	Mediates the incorporation of phosphate into alpha-glucan, mostly at the C-6 position of glucose units. {ECO:0000250}.	carbohydrate metabolic process [GO:0005975]
	Lus10032830	10599812	10613138	+	UPL1_ARATH	UPL1 At1g55860 F14J16.14 F14J16.37	E3 ubiquitin-protein ligase UPL1 (Ubiquitin-protein ligase 1) (EC 2.3.2.26) (HECT-type E3 ubiquitin transferase UPL1)		ath:AT1G55860	Probable E3 ubiquitin-protein ligase which mediates ubiquitination and subsequent proteasomal degradation of target proteins. {ECO:0000303|PubMed:10571878}.	positive regulation of protein catabolic process [GO:0045732]; proteasome-mediated ubiquitin-dependent protein catabolic process [GO:0043161]; protein polyubiquitination [GO:0000209]; protein ubiquitination [GO:0016567]
	Lus10032833	10626163	10634593	-	SAB_ARATH	SAB HPS4 At1g58250 F16M22.5 T18I24.18	Protein SABRE (Protein HYPERSENSITIVE TO PI STARVATION 4)	Secreted {ECO:0000250|UniProtKB:Q6IMT0}. Golgi apparatus {ECO:0000250|UniProtKB:K7VLR4}.	ath:AT1G58250	May be involved in membrane trafficking (By similarity). Required for cell expansion, especially in root cortex, probably by counteracting the action of ethylene in promoting cells radial expansion (PubMed:7867930, PubMed:8275864). Involved in female organ development (PubMed:14675453). Antagonistically interacts with ethylene signaling to regulate plant responses to Pi starvation (PubMed:2261514…	cellular response to phosphate starvation [GO:0016036]; negative regulation of ethylene-activated signaling pathway [GO:0010105]; positive regulation of cell growth [GO:0030307]
Lu14_3479083	Lus10020525	3504202	3505209	-	SNC1_ARATH	SNC1 BAL At4g16890 dl4475c FCAALL.51	Protein SUPPRESSOR OF npr1-1, CONSTITUTIVE 1 (AtSNC1) (Disease resistance RPP5-like protein) (Probable NAD(+) hydrolase SNC1) (EC 3.2.2.6)	Cytoplasm {ECO:0000269|PubMed:21079790}. Microsome {ECO:0000269|PubMed:21079790}. Nucleus {ECO:0000269|PubMed:21079790, ECO:0000269|PubMed:22454454}. Note=Restricted to microsomes when interacting with SRFR1. Accumulates in nucleus at 22 degrees Celsius, but not at 28 degrees Celsius. Nuclear accumulation is enhanced by abscisic acid deficiency. {ECO:0000269|PubMed:21079790, ECO:0000269|PubMed:22…	ath:AT4G16890	Disease resistance protein of the TIR-NB-LRR-type (PubMed:14576290). Part of the RPP5 locus that contains a cluster of several paralogous disease resistance (R) genes (PubMed:14576290). Resistance proteins guard the plant against pathogens that contain an appropriate avirulence protein via an indirect interaction with this avirulence protein (PubMed:14576290). That triggers a defense system inclu…	defense response to bacterium [GO:0042742]; response to auxin [GO:0009733]; systemic acquired resistance, salicylic acid mediated signaling pathway [GO:0009862]
	Lus10020526	3497052	3497309	-	E138_ARATH	At1g64760 F13O11.7	Glucan endo-1,3-beta-glucosidase 8 (EC 3.2.1.39) ((1->3)-beta-glucan endohydrolase 8) ((1->3)-beta-glucanase 8) (Beta-1,3-endoglucanase 8) (Beta-1,3-glucanase 8)	Secreted, cell wall {ECO:0000305}. Cell membrane; Lipid-anchor, GPI-anchor; Extracellular side.	ath:AT1G64760		carbohydrate metabolic process [GO:0005975]; defense response [GO:0006952]; plant-type cell wall organization [GO:0009664]
	Lus10020531	3480213	3485287	+	SYFB_ARATH	At1g72550 F28P22.26	Phenylalanine--tRNA ligase beta subunit, cytoplasmic (EC 6.1.1.20) (Phenylalanyl-tRNA synthetase beta subunit) (PheRS)	Cytoplasm, cytosol {ECO:0000305|PubMed:16251277, ECO:0000305|PubMed:16297076}.	ath:AT1G72550		phenylalanyl-tRNA aminoacylation [GO:0006432]
	Lus10020532	3472925	3479322	+	PTM_ARATH	PTM DDP1 At5g35210 K3D20.8	DDT domain-containing protein PTM (DDT domain-containing protein 1) (Membrane-bound transcription factor PTM) (PHD type transcription factor with transmembrane domains)	Plastid, chloroplast outer membrane {ECO:0000269|PubMed:21934661}; Multi-pass membrane protein {ECO:0000255}. Nucleus {ECO:0000269|PubMed:21934661}. Note=Localized primarily in the chloroplast outer membrane as dormant form and, upon specific stimulation, is released from the membrane through proteolytic cleavage, and its cleaved fragment containing the transcription factor domain is redistribute…	ath:AT5G35210	Membrane-bound transcription factor required for the plastid-to-nucleus retrograde signaling. Functions in multiple retrograde pathways. The plastid-to-nucleus signal plays an important role in the coordinated expression of both nuclear- and chloroplast-localized genes that encode photosynthesis-related proteins. In the nucleus, activates ABI4 transcription in a PHD-dependent manner associated wi…	chloroplast-nucleus signaling pathway [GO:0010019]; positive regulation of transcription, DNA-templated [GO:0045893]
	Lus10020533	3464751	3468704	+	L6_LINUS	L6	Disease resistance protein L6 (NAD(+) hydrolase L6) (EC 3.2.2.6) (NADP(+) hydrolase L6) (EC 3.2.2.-)		ag:AAA91022	TIR-NB-LRR receptor-like protein that confers resistance to the flax rust phytopathogenic fungus (M.lini) (PubMed:7549479). Acts as a NAD(+) hydrolase (NADase): in response to activation, catalyzes cleavage of NAD(+) into ADP-D-ribose (ADPR) and nicotinamide; NAD(+) cleavage triggering a defense system that promotes cell death (PubMed:31439792). Also able to hydrolyze NADP(+), but not other NAD(+…	defense response [GO:0006952]; NAD catabolic process [GO:0019677]; positive regulation of programmed cell death [GO:0043068]; signal transduction [GO:0007165]
	Lus10020534	3457175	3462957	+	L6_LINUS	L6	Disease resistance protein L6 (NAD(+) hydrolase L6) (EC 3.2.2.6) (NADP(+) hydrolase L6) (EC 3.2.2.-)		ag:AAA91022	TIR-NB-LRR receptor-like protein that confers resistance to the flax rust phytopathogenic fungus (M.lini) (PubMed:7549479). Acts as a NAD(+) hydrolase (NADase): in response to activation, catalyzes cleavage of NAD(+) into ADP-D-ribose (ADPR) and nicotinamide; NAD(+) cleavage triggering a defense system that promotes cell death (PubMed:31439792). Also able to hydrolyze NADP(+), but not other NAD(+…	defense response [GO:0006952]; NAD catabolic process [GO:0019677]; positive regulation of programmed cell death [GO:0043068]; signal transduction [GO:0007165]
	Lus10020535	3454633	3455556	+	IPMKB_ARATH	IPK2b IP3K IPMK At5g61760 MAC9.7 MAC9_60	Inositol polyphosphate multikinase beta (EC 2.7.1.140) (EC 2.7.1.151) (Inositol polyphosphate 6-/3-/5-kinase beta) (AtIpk2-beta) (AtIpk2beta)	Nucleus {ECO:0000269|PubMed:12566584}.	ath:AT5G61760	Inositol phosphate kinase with a broad substrate specificity. Phosphorylates inositol 1,4,5-trisphosphate (Ins(1,4,5)P3), inositol 1,4,5,6-tetrakisphosphate (Ins(1,4,5,6)P4), inositol 1,3,4,5-tetrakisphosphate (Ins(1,3,4,5)P4), inositol 1,3,4,6-tetrakisphosphate (Ins(1,3,4,6)P4) and inositol 1,2,3,4,6-pentakisphosphate (Ins(1,2,3,4,6)P5) but not inositol 1,4-bisphosphate (Ins(1,4)P2), inositol 1,…	embryo development ending in seed dormancy [GO:0009793]; inositol phosphate biosynthetic process [GO:0032958]; myo-inositol hexakisphosphate biosynthetic process [GO:0010264]; pollen development [GO:0009555]; pollen tube guidance [GO:0010183]; regulation of transcription, DNA-templated [GO:0006355]; response to glucose [GO:0009749]
	Lus10020536	3447892	3451509	+	L6_LINUS	L6	Disease resistance protein L6 (NAD(+) hydrolase L6) (EC 3.2.2.6) (NADP(+) hydrolase L6) (EC 3.2.2.-)		ag:AAA91022	TIR-NB-LRR receptor-like protein that confers resistance to the flax rust phytopathogenic fungus (M.lini) (PubMed:7549479). Acts as a NAD(+) hydrolase (NADase): in response to activation, catalyzes cleavage of NAD(+) into ADP-D-ribose (ADPR) and nicotinamide; NAD(+) cleavage triggering a defense system that promotes cell death (PubMed:31439792). Also able to hydrolyze NADP(+), but not other NAD(+…	defense response [GO:0006952]; NAD catabolic process [GO:0019677]; positive regulation of programmed cell death [GO:0043068]; signal transduction [GO:0007165]
Lu14_5466654	Lus10006839	5441511	5443766	+	Y3136_ARATH	At3g21360 MHC9_4	Clavaminate synthase-like protein At3g21360 (EC 1.-.-.-)		ath:AT3G21360
	Lus10006840	5452015	5452419	+	Y3136_ARATH	At3g21360 MHC9_4	Clavaminate synthase-like protein At3g21360 (EC 1.-.-.-)		ath:AT3G21360
	Lus10006841	5455841	5459316	+	LYK3_ARATH	LYK3 At1g51940 T14L22.13	LysM domain receptor-like kinase 3 (LysM-containing receptor-like kinase 3) (EC 2.7.11.-)	Cell membrane {ECO:0000250}; Single-pass membrane protein {ECO:0000250}.	ath:AT1G51940	Putative Lysin motif (LysM) receptor kinase that may recognize microbe-derived N-acetylglucosamine (NAG)-containing ligands. {ECO:0000250}.	abscisic acid-activated signaling pathway [GO:0009738]; defense response [GO:0006952]; defense response to fungus [GO:0050832]; innate immune response [GO:0045087]; negative regulation of defense response [GO:0031348]; positive regulation of abscisic acid-activated signaling pathway [GO:0009789]; response to abscisic acid [GO:0009737]
	Lus10006842	5465918	5467969	+	IAA26_ARATH	IAA26 PAP1 At3g16500 MDC8.13	Auxin-responsive protein IAA26 (Indoleacetic acid-induced protein 26) (Phytochrome-associated protein 1)	Nucleus {ECO:0000250}.	ath:AT3G16500	Aux/IAA proteins are short-lived transcriptional factors that function as repressors of early auxin response genes at low auxin concentrations. Repression is thought to result from the interaction with auxin response factors (ARFs), proteins that bind to the auxin-responsive promoter element (AuxRE). Formation of heterodimers with ARF proteins may alter their ability to modulate early auxin respo…	auxin-activated signaling pathway [GO:0009734]; response to auxin [GO:0009733]
	Lus10006843	5471620	5474648	-	HXK1_TOBAC	HXK1	Hexokinase-1 (EC 2.7.1.1) (NtHxK1)	Plastid, chloroplast outer membrane {ECO:0000305}; Single-pass membrane protein {ECO:0000305}.	nta:107797523	Fructose and glucose phosphorylating enzyme. {ECO:0000250|UniProtKB:Q6Q8A5}.	cellular glucose homeostasis [GO:0001678]; glucose 6-phosphate metabolic process [GO:0051156]; glycolytic process [GO:0006096]; hexose metabolic process [GO:0019318]
	Lus10006844	5476026	5479364	-	PAPS4_ARATH	PAPS4 NPAP At4g32850 T16I18.60	Nuclear poly(A) polymerase 4 (AtPAP(IV)) (PAP(IV)) (Poly(A) polymerase IV) (nPAP) (EC 2.7.7.19) (Polynucleotide adenylyltransferase 4)	Nucleus {ECO:0000255|PROSITE-ProRule:PRU00768, ECO:0000269|PubMed:19956626}.	ath:AT4G32850	Essential protein (PubMed:19956626). Polymerase that creates the 3'-poly(A) tail of mRNA's (PubMed:15297145). Also required for the endoribonucleolytic cleavage reaction at some polyadenylation sites. May acquire specificity through interaction with a cleavage and polyadenylation specificity factor (CPSF) at its C-terminus (By similarity). {ECO:0000250|UniProtKB:P25500, ECO:0000269|PubMed:1529714…	mRNA polyadenylation [GO:0006378]; RNA polyadenylation [GO:0043631]
	Lus10006845	5488610	5491174	+
	Lus10006846	5491703	5494110	-	PROF_PYRCO		Profilin (Allergen Pyr c 3) (allergen Pyr c 4)	Cytoplasm, cytoskeleton {ECO:0000250}.		Binds to actin and affects the structure of the cytoskeleton. At high concentrations, profilin prevents the polymerization of actin, whereas it enhances it at low concentrations. By binding to PIP2, it inhibits the formation of IP3 and DG (By similarity). {ECO:0000250}.
	Lus10006847	5494994	5496051	-
Lu14_14605949	Lus10035842	14628608	14634574	+	KTN83_ARATH	KTN80.3 At5g08390 F8L15.120	Katanin p80 WD40 repeat-containing subunit B1 homolog KTN80.3	Cytoplasm, cytoskeleton {ECO:0000255|HAMAP-Rule:MF_03022, ECO:0000269|PubMed:28978669}. Note=Present in dynamic discrete particles specifically localized to microtubule (MT) crossovers and branching nucleation sites. {ECO:0000269|PubMed:28978669}.	ath:AT5G08390	May participate in a complex which severs microtubules in an ATP-dependent manner (By similarity). Microtubule severing may promote rapid reorganization of cellular microtubule arrays (By similarity). Confers precision to microtubule (MT) severing by specific targeting of KTN1 to MT cleavage sites such as crossover or branching nucleation sites (PubMed:28978669). Together with other KTN80s, regul…	microtubule depolymerization [GO:0007019]; microtubule severing [GO:0051013]; regulation of unidimensional cell growth [GO:0051510]
	Lus10035843	14622992	14626078	+	SK1_ARATH	SK1 At2g21940 F7D8.26	Shikimate kinase 1, chloroplastic (AtSK1) (EC 2.7.1.71)	Plastid, chloroplast {ECO:0000250}.	ath:AT2G21940	Catalyzes the specific phosphorylation of the 3-hydroxyl group of shikimic acid using ATP as a cosubstrate. {ECO:0000269|PubMed:19057671, ECO:0000269|PubMed:21520319}.	aromatic amino acid family biosynthetic process [GO:0009073]; cellular amino acid biosynthetic process [GO:0008652]; chorismate biosynthetic process [GO:0009423]
	Lus10035844	14615766	14617924	-	C78A7_ARATH	CYP78A7 At5g09970 MYH9.18	Cytochrome P450 78A7 (EC 1.14.-.-)	Membrane {ECO:0000305}; Single-pass membrane protein {ECO:0000305}.	ath:AT5G09970	Functions probably in association with CYP78A5 in regulating relative growth of the shoot apical meristem and plant organs via a non-cell-autonomous signal. {ECO:0000269|PubMed:18492871}.	regulation of growth [GO:0040008]; regulation of timing of plant organ formation [GO:0090709]
	Lus10035845	14611036	14615031	+	DPE1_ARATH	DPE1 At5g64860 MXK3.9	4-alpha-glucanotransferase DPE1, chloroplastic/amyloplastic (EC 2.4.1.25) (Amylomaltase) (Disproportionating enzyme) (D-enzyme) (Protein DISPROPORTIONATING ENZYME 1)	Plastid, chloroplast. Plastid, amyloplast {ECO:0000305}.	ath:AT5G64860	Chloroplastic alpha-glucanotransferase involved in maltotriose metabolism. Probably uses maltotriose as substrate to transfer a maltosyl unit from one molecule to another, resulting in glucose and maltopentaose. The latter can then be further metabolized to maltose and maltotriose by beta-amylase. Required for normal starch degradation in leaves. {ECO:0000269|PubMed:11359613, ECO:0000269|PubMed:1…	glucose metabolic process [GO:0006006]; maltose catabolic process [GO:0000025]; starch catabolic process [GO:0005983]
	Lus10035846	14608867	14609653	+	STEP2_ARATH	SEP2 At2g21970 F7D8.29	Stress enhanced protein 2, chloroplastic	Plastid, chloroplast thylakoid membrane {ECO:0000269|PubMed:10725357}; Multi-pass membrane protein {ECO:0000255}.	ath:AT2G21970	May be involved in non-photochemical quenching, a process that maintains the balance between dissipation and utilization of light energy to minimize generation of oxidizing molecules, thereby protecting the plant against photo-oxidative damage (By similarity). May play a photoprotective role in the thylakoid membrane in response to light stress (Probable). {ECO:0000250|UniProtKB:Q9XF91, ECO:00003…	cellular response to high light intensity [GO:0071486]; cellular response to UV-A [GO:0071492]; photosynthesis, light harvesting [GO:0009765]; response to wounding [GO:0009611]
	Lus10035847	14606868	14607857	+	MIZ1_ARATH	MIZ1 At2g41660 T32G6.18	Protein MIZU-KUSSEI 1	Endoplasmic reticulum membrane {ECO:0000269|PubMed:22285304}. Note=Soluble protein associated with the ER.	ath:AT2G41660	Plays a role in lateral root development by maintaining auxin levels. This function requires GNOM (GN/MIZ2) activity. Negatively regulates cytokinin sensitivity on root development. Positively regulates hydrotropism in roots. {ECO:0000269|PubMed:17360591, ECO:0000269|PubMed:21940997, ECO:0000269|PubMed:22285304, ECO:0000269|PubMed:22321255, ECO:0000269|PubMed:23012350}.	chloroplast organization [GO:0009658]; hydrotropism [GO:0010274]
	Lus10035848	14603834	14606235	+
	Lus10035849	14593548	14595481	-
	Lus10035850	14591317	14592975	+	PP358_ARATH	EMB2453 At4g39620 F23K16.250	Pentatricopeptide repeat-containing protein At4g39620, chloroplastic (Protein EMBRYO DEFECTIVE 2453)	Plastid, chloroplast {ECO:0000305}.	ath:AT4G39620	Essential for embryo development. {ECO:0000269|PubMed:15647901}.	embryo development ending in seed dormancy [GO:0009793]
	Lus10035851	14587885	14590430	-	RDM4_ARATH	RDM4 DMS4 At2g30280 T9D9.9	RNA-directed DNA methylation 4 (Protein DEFECTIVE IN MERISTEM SILENCING 4)		ath:AT2G30280	Probable regulatory factor for several RNA polymerases. Effector involved in facilitation of Pol V transcription as RNA scaffold and recruitment of silencing complex to target genomic sites. {ECO:0000269|PubMed:19903758, ECO:0000269|PubMed:20010803}.	DNA methylation [GO:0006306]; gene silencing by RNA [GO:0031047]; post-embryonic development [GO:0009791]; regulation of transcription, DNA-templated [GO:0006355]
	Lus10035852	14584736	14587151	+
	Lus10035853	14578426	14583527	+	AB1K8_ARATH	ABC1K8 ATH13 OSA1 At5g64940 MXK3.17	Protein ACTIVITY OF BC1 COMPLEX KINASE 8, chloroplastic (ABC1-LIKE KINASE 8) (EC 2.7.11.1) (ABC2 homolog protein 13) (AtATH13) (Oxidative stress-related ABC1-like protein 1, chloroplastic) (AtOSA1)	Plastid, chloroplast envelope {ECO:0000269|PubMed:18390807, ECO:0000269|PubMed:24117441}. Plastid, chloroplast membrane {ECO:0000269|PubMed:18390807, ECO:0000269|PubMed:24117441}; Single-pass membrane protein {ECO:0000255}.	ath:AT5G64940	Involved in resistance to oxidative stress (e.g. hydrogen peroxide H(2)O(2)), high light and heavy metals (e.g. cadmium ions Cd(2+)) (PubMed:18390807, PubMed:24117441). Influences responses to reactive oxygen species (ROS) production. Together with SIA1, regulates iron distribution within the chloroplast and mediates the oxidative stress response (PubMed:24117441). Together with ABC1K7, influence…	cellular response to oxidative stress [GO:0034599]; circadian rhythm [GO:0007623]; iron ion homeostasis [GO:0055072]; leaf senescence [GO:0010150]; membrane lipid biosynthetic process [GO:0046467]; regulation of response to reactive oxygen species [GO:1901031]; response to cadmium ion [GO:0046686]; response to high light intensity [GO:0009644]; response to hydrogen peroxide [GO:0042542]; response…
Lu14_15884820	Lus10042141	15912350	15915423	+	SDH7B_ARATH	SDH7B At5g62575	Succinate dehydrogenase subunit 7B, mitochondrial	Mitochondrion inner membrane {ECO:0000305}; Peripheral membrane protein {ECO:0000305}.	ath:AT5G62575		tricarboxylic acid cycle [GO:0006099]
	Lus10042142	15910060	15912225	-	Y5010_ARATH	At5g50100 MPF21.11	Uncharacterized protein At5g50100, chloroplastic	Plastid, chloroplast {ECO:0000305}.	ath:AT5G50100		tissue regeneration [GO:0042246]
	Lus10042143	15906036	15909687	+	MNS5_ARATH	MNS5 At1g27520 T17H3.2	Alpha-mannosidase I MNS5 (EC 3.2.1.-)	Endoplasmic reticulum membrane {ECO:0000269|PubMed:24737672}; Single-pass type II membrane protein {ECO:0000305}.	ath:AT1G27520	Can convert Man(9)GlcNAc(2) and Man(8)GlcNAc(2) into N-glycans with a terminal alpha-1,6-linked Man residue in the C-branch. Functions in the formation of unique N-glycan structures that are specifically recognized by components of the endoplasmic reticulum-associated degradation (ERAD) machinery, which leads to the degradation of misfolded glycoproteins. Most likely generates N-glycan signal on …	carbohydrate metabolic process [GO:0005975]; endoplasmic reticulum mannose trimming [GO:1904380]; mannose trimming involved in glycoprotein ERAD pathway [GO:1904382]; protein glycosylation [GO:0006486]; ubiquitin-dependent ERAD pathway [GO:0030433]
	Lus10042144	15904026	15905033	-	PER6_ARATH	PER6 P6 At1g24110 F3I6.3	Peroxidase 6 (Atperox P6) (EC 1.11.1.7)	Secreted {ECO:0000255|PROSITE-ProRule:PRU00297}.	ath:AT1G24110	Removal of H(2)O(2), oxidation of toxic reductants, biosynthesis and degradation of lignin, suberization, auxin catabolism, response to environmental stresses such as wounding, pathogen attack and oxidative stress. These functions might be dependent on each isozyme/isoform in each plant tissue.	hydrogen peroxide catabolic process [GO:0042744]; response to oxidative stress [GO:0006979]
	Lus10042145	15901678	15902427	-	PSA4A_ARATH	PAC1 PRC9 PRS1 At3g22110 MKA23.2	Proteasome subunit alpha type-4-A (20S proteasome alpha subunit C-1) (Proteasome 27 kDa subunit) (Proteasome component 9) (Proteasome subunit alpha type-3)	Cytoplasm {ECO:0000250}. Nucleus {ECO:0000250}.	ath:AT3G22110	The proteasome is a multicatalytic proteinase complex which is characterized by its ability to cleave peptides with Arg, Phe, Tyr, Leu, and Glu adjacent to the leaving group at neutral or slightly basic pH. The proteasome has an ATP-dependent proteolytic activity.	proteasomal protein catabolic process [GO:0010498]; ubiquitin-dependent protein catabolic process [GO:0006511]
	Lus10042147	15891053	15893576	-	OPT5_ARATH	OPT5 At4g26590 T15N24.40	Oligopeptide transporter 5 (AtOPT5)	Membrane {ECO:0000305}; Multi-pass membrane protein {ECO:0000305}.	ath:AT4G26590	Involved in the translocation of tetra- and pentapeptides across the cellular membrane in an energy-dependent manner. {ECO:0000269|PubMed:11788749}.	protein transport [GO:0015031]
	Lus10042148	15887105	15890381	-	BADH1_ARATH	ALDH10A8 At1g74920 F25A4.11 F9E10.23	Aminoaldehyde dehydrogenase ALDH10A8, chloroplastic (EC 1.2.1.-) (4-trimethylammoniobutyraldehyde dehydrogenase ALDH10A8) (EC 1.2.1.47) (Aldehyde dehydrogenase family 10 member A8) (Aminobutyraldehyde dehydrogenase ALDH10A8) (EC 1.2.1.19) (Betaine aldehyde dehydrogenase ALDH10A8) (EC 1.2.1.8) (Gamma-guanidinobutyraldehyde dehydrogenase ALDH10A8) (EC 1.2.1.54)	Cytoplasm {ECO:0000269|PubMed:21053011, ECO:0000269|PubMed:27725774}. Plastid, chloroplast {ECO:0000269|PubMed:27725774}. Note=Localizes in small organelles that may be leucoplasts. {ECO:0000269|PubMed:21053011}.	ath:AT1G74920	Dehydrogenase that catalyzes the oxidation of several aminoaldehydes (PubMed:27725774, PubMed:32845293). Metabolizes and detoxifies aldehyde products of polyamine degradation to non-toxic amino acids (Probable). Catalyzes the oxidation of 4-aminobutanal and 3-aminopropanal to 4-aminobutanoate and beta-alanine, respectively (PubMed:27725774, PubMed:32845293). Production of 4-aminobutinoate by ALDH…	glycine betaine biosynthetic process from choline [GO:0019285]; response to salt stress [GO:0009651]; response to water deprivation [GO:0009414]
	Lus10042149	15883229	15886537	-	BADH1_ARATH	ALDH10A8 At1g74920 F25A4.11 F9E10.23	Aminoaldehyde dehydrogenase ALDH10A8, chloroplastic (EC 1.2.1.-) (4-trimethylammoniobutyraldehyde dehydrogenase ALDH10A8) (EC 1.2.1.47) (Aldehyde dehydrogenase family 10 member A8) (Aminobutyraldehyde dehydrogenase ALDH10A8) (EC 1.2.1.19) (Betaine aldehyde dehydrogenase ALDH10A8) (EC 1.2.1.8) (Gamma-guanidinobutyraldehyde dehydrogenase ALDH10A8) (EC 1.2.1.54)	Cytoplasm {ECO:0000269|PubMed:21053011, ECO:0000269|PubMed:27725774}. Plastid, chloroplast {ECO:0000269|PubMed:27725774}. Note=Localizes in small organelles that may be leucoplasts. {ECO:0000269|PubMed:21053011}.	ath:AT1G74920	Dehydrogenase that catalyzes the oxidation of several aminoaldehydes (PubMed:27725774, PubMed:32845293). Metabolizes and detoxifies aldehyde products of polyamine degradation to non-toxic amino acids (Probable). Catalyzes the oxidation of 4-aminobutanal and 3-aminopropanal to 4-aminobutanoate and beta-alanine, respectively (PubMed:27725774, PubMed:32845293). Production of 4-aminobutinoate by ALDH…	glycine betaine biosynthetic process from choline [GO:0019285]; response to salt stress [GO:0009651]; response to water deprivation [GO:0009414]
	Lus10042150	15879889	15882116	-
	Lus10042151	15878166	15879154	-
	Lus10042152	15875332	15877656	+	CDC23_ARATH	APC8 CDC23 At3g48150 T24C20.30	Anaphase-promoting complex subunit 8 (Cell division cycle protein 23 homolog) (CDC23 homolog) (Cyclosome subunit 8)	Nucleus {ECO:0000250}.	ath:AT3G48150	Component of the anaphase promoting complex/cyclosome (APC/C), a cell cycle-regulated E3 ubiquitin-protein ligase complex that controls progression through mitosis and the G1 phase of the cell cycle. The APC/C complex controls several key steps in the cell cycle by mediating ubiquitination and subsequent degradation of target proteins such as cyclins. The APC/C complex is required for the female …	anaphase-promoting complex-dependent catabolic process [GO:0031145]; cell division [GO:0051301]; metaphase/anaphase transition of mitotic cell cycle [GO:0007091]; positive regulation of mitotic metaphase/anaphase transition [GO:0045842]; protein ubiquitination [GO:0016567]; regulation of defense response [GO:0031347]
	Lus10042153	15871643	15872784	-	ARR5_ARATH	ARR5 ATRR2 IBC6 At3g48100 T17F15.30	Two-component response regulator ARR5 (Response reactor 2)	Nucleus {ECO:0000305}.	ath:AT3G48100	Functions as response regulator involved in His-to-Asp phosphorelay signal transduction system. Phosphorylation of the Asp residue in the receiver domain activates the ability of the protein to promote the transcription of target genes. Type-A response regulators seem to act as negative regulators of the cytokinin signaling. {ECO:0000269|PubMed:14973166, ECO:0000269|PubMed:9482949}.	circadian rhythm [GO:0007623]; cytokinin-activated signaling pathway [GO:0009736]; regulation of transcription, DNA-templated [GO:0006355]; response to cytokinin [GO:0009735]; response to red light [GO:0010114]
	Lus10042154	15865318	15866795	-	FH4_ARATH	FH4 At1g24150 F3I6.8	Formin-like protein 4 (AtFH4) (AtFORMIN-4)	Cell membrane {ECO:0000269|PubMed:16313636}; Single-pass membrane protein {ECO:0000269|PubMed:16313636}.	ath:AT1G24150	Might be involved in the organization and polarity of the actin cytoskeleton. {ECO:0000269|PubMed:16313636}.
	Lus10042155	15863982	15864985	+	FL3H_CALCH	FHT	Naringenin,2-oxoglutarate 3-dioxygenase (EC 1.14.11.9) (FHT) (Flavanone-3-hydroxylase) (F3H)			Catalyzes the 3-beta-hydroxylation of 2S-flavanones to 2R,3R-dihydroflavonols which are intermediates in the biosynthesis of flavonols, anthocyanidins, catechins and proanthocyanidins in plants.	flavonoid biosynthetic process [GO:0009813]
	Lus10042156	15860744	15862114	+
Lu14_17172543	Lus10005586	17146955	17148018	-	RL132_BRANA		60S ribosomal protein L13-2 (Cold-induced protein C24B)		bna:106387836		translation [GO:0006412]
	Lus10005587	17149654	17151649	+	PME51_ARATH	PME51 ARATH51 At5g09760 F17I14.50	Probable pectinesterase/pectinesterase inhibitor 51 [Includes: Pectinesterase inhibitor 51 (Pectin methylesterase inhibitor 51); Pectinesterase 51 (PE 51) (EC 3.1.1.11) (Pectin methylesterase 51) (AtPME51)]	Secreted, cell wall {ECO:0000250}.	ath:AT5G09760	Acts in the modification of cell walls via demethylesterification of cell wall pectin. {ECO:0000250}.	cell wall modification [GO:0042545]; pectin catabolic process [GO:0045490]
	Lus10005588	17153959	17158013	+	DSC1_ARATH	DSC1 At4g12010 F16J13.80	Disease resistance-like protein DSC1 (EC 3.2.2.6) (Protein DOMINANT SUPPRESSOR OF CAMTA3 NUMBER 1)		ath:AT4G12010	TIR-NB-LRR receptor-like protein involved in plant defense. Acts as a trigger of hypersensitive response (HR). Functions as guard of CAMTA3, a negative regulator of immunity, during pathogen infection. {ECO:0000269|PubMed:28407487}.	defense response to bacterium [GO:0042742]; plant-type hypersensitive response [GO:0009626]; signal transduction [GO:0007165]
	Lus10005589	17158178	17160735	-
	Lus10005590	17161623	17164043	-	GLO1_ARATH	GLO1 At3g14420 MAO2.2	Glycolate oxidase 1 (AtGLO1) (GOX1) (EC 1.1.3.15) ((S)-2-hydroxy-acid oxidase GLO1) (Short chain alpha-hydroxy acid oxidase GLO1)	Peroxisome {ECO:0000250}.	ath:AT3G14420	Catalyzes the oxidation of glycolate to glyoxylate, with a reduction of O2 to H2O2 (PubMed:25416784). Is a key enzyme in photorespiration in green plants (Probable). {ECO:0000269|PubMed:25416784, ECO:0000305|PubMed:25416784}.	defense response to bacterium [GO:0042742]; hydrogen peroxide biosynthetic process [GO:0050665]; oxidative photosynthetic carbon pathway [GO:0009854]
	Lus10005591	17165838	17169609	+	UBP25_ARATH	UBP25 At3g14400 MLN21.18	Ubiquitin carboxyl-terminal hydrolase 25 (EC 3.4.19.12) (Deubiquitinating enzyme 25) (AtUBP25) (Ubiquitin thioesterase 25) (Ubiquitin-specific-processing protease 25)		ath:AT3G14400	Recognizes and hydrolyzes the peptide bond at the C-terminal Gly of ubiquitin. Involved in the processing of poly-ubiquitin precursors as well as that of ubiquitinated proteins (By similarity). {ECO:0000250}.	protein deubiquitination [GO:0016579]; ubiquitin-dependent protein catabolic process [GO:0006511]
	Lus10005592	17170426	17171875	+	GSTX4_TOBAC		Probable glutathione S-transferase (EC 2.5.1.18) (Auxin-induced protein PCNT107)		nta:107782951		auxin-activated signaling pathway [GO:0009734]; glutathione metabolic process [GO:0006749]
	Lus10005593	17172425	17173752	-	MSRB1_ARATH	MSRB1 At1g53670 F22G10.17	Peptide methionine sulfoxide reductase B1, chloroplastic (AtMSRB1) (EC 1.8.4.12) (Peptide-methionine (R)-S-oxide reductase)	Plastid, chloroplast {ECO:0000269|PubMed:15923321}.	ath:AT1G53670	Catalyzes the reduction of methionine sulfoxide (MetSO) to methionine in proteins. Specifically reduces the MetSO R-enantiomer. Plays a protective role against oxidative stress by restoring activity to proteins that have been inactivated by methionine oxidation. May play an essential function in association with MSRB2 in maintaining vegetative growth during environmental constraints, through the …	protein repair [GO:0030091]; response to oxidative stress [GO:0006979]
	Lus10005594	17175415	17176436	+	WIN1_SOLTU	WIN1	Wound-induced protein WIN1		sot:102582068		defense response to bacterium [GO:0042742]; defense response to fungus [GO:0050832]
	Lus10005595	17177212	17177889	+	WIN2_SOLTU	WIN2	Wound-induced protein WIN2		sot:102581743		defense response to bacterium [GO:0042742]; defense response to fungus [GO:0050832]
	Lus10005596	17178443	17179190	+	HEVL_ARATH	HEL At3g04720 F7O18.21	Hevein-like preproprotein [Cleaved into: CB-HEL; CD-HEL (EC 3.1.-.-) (RNase)]	Vacuole {ECO:0000269|PubMed:22868784}. Note=associated with the tonoplast.	ath:AT3G04720	Fungal growth inhibitors. Neither CB-HEL nor CD-HEL have chitinase activity, but both have antimicrobial activities. CD-HEL has RNase, but no DNase activity. {ECO:0000269|PubMed:22868784}.	defense response to bacterium [GO:0042742]; defense response to fungus [GO:0050832]; killing of cells of other organism [GO:0031640]; response to ethylene [GO:0009723]; response to herbivore [GO:0080027]; response to virus [GO:0009615]; systemic acquired resistance [GO:0009627]
	Lus10039212	17200847	17203081	+	PR4B_TOBAC		Pathogenesis-related protein PR-4B	Secreted, cell wall {ECO:0000250}.	nta:107766311		defense response to bacterium [GO:0042742]; defense response to fungus [GO:0050832]
Lu15_4120547	Lus10020501	4120286	4122524	+	MDHG_CITLA		Malate dehydrogenase, glyoxysomal (EC 1.1.1.37)	Glyoxysome.			glyoxylate cycle [GO:0006097]; malate metabolic process [GO:0006108]; tricarboxylic acid cycle [GO:0006099]
	Lus10020502	4122616	4124224	-
	Lus10020503	4125478	4126416	-	BH025_ARATH	BHLH25 EN29 At4g37850 T28I19.130	Transcription factor bHLH25 (Basic helix-loop-helix protein 25) (AtbHLH25) (bHLH 25) (Transcription factor EN 29) (bHLH transcription factor bHLH025)	Nucleus {ECO:0000255|PROSITE-ProRule:PRU00981}.	ath:AT4G37850		regulation of transcription, DNA-templated [GO:0006355]
	Lus10020504	4134089	4136010	+	GALDH_ARATH	LGALDH At4g33670 T16L1.160	L-galactose dehydrogenase (At-GalDH) (L-GalDH) (EC 1.1.1.316)		ath:AT4G33670	Catalyzes the oxidation of L-galactose to L-galactono-1,4-lactone in the presence of NAD(+). Uses NAD(+) as a hydrogen acceptor much more efficiently than NADP(+). {ECO:0000269|PubMed:12047629}.	galactose metabolic process [GO:0006012]; L-ascorbic acid biosynthetic process [GO:0019853]
	Lus10020505	4136644	4141364	-	ZDHC2_ARATH	PAT23 At2g14255 T1O16.20	Probable protein S-acyltransferase 23 (EC 2.3.1.225) (Probable palmitoyltransferase At2g14255) (Zinc finger DHHC domain-containing protein At2g14255)	Golgi apparatus membrane {ECO:0000305}; Multi-pass membrane protein {ECO:0000305}.	ath:AT2G14255	Palmitoyl acyltransferase. {ECO:0000250, ECO:0000269|Ref.4}.	peptidyl-L-cysteine S-palmitoylation [GO:0018230]; protein targeting to membrane [GO:0006612]
	Lus10020506	4142921	4146330	-	SUS_SOYBN	SS	Sucrose synthase (EC 2.4.1.13) (Nodulin-100) (N-100) (Sucrose-UDP glucosyltransferase)		gmx:547508	Sucrose-cleaving enzyme that provides UDP-glucose and fructose for various metabolic pathways.	nodulation [GO:0009877]; sucrose metabolic process [GO:0005985]
Lu15_12795055	Lus10010347	12823444	12823806	-	VQ9_ARATH	VQ9 At1g78310 F3F9.15	VQ motif-containing protein 9 (AtVQ9)	Nucleus {ECO:0000269|PubMed:23451802}.	ath:AT1G78310	Functions as a negative regulator of salt stress response. Functions as repressor of WRKY8 transcription factor by decreasing the DNA-binding activity of WRKY8 and acts antagonistically with WRKY8 to regulate sodium and potassium homeostasis under salt stress. {ECO:0000269|PubMed:23451802}.	cellular potassium ion homeostasis [GO:0030007]; cellular sodium ion homeostasis [GO:0006883]; negative regulation of DNA-binding transcription factor activity [GO:0043433]; negative regulation of response to salt stress [GO:1901001]
	Lus10010348	12822798	12823400	-	VQ9_ARATH	VQ9 At1g78310 F3F9.15	VQ motif-containing protein 9 (AtVQ9)	Nucleus {ECO:0000269|PubMed:23451802}.	ath:AT1G78310	Functions as a negative regulator of salt stress response. Functions as repressor of WRKY8 transcription factor by decreasing the DNA-binding activity of WRKY8 and acts antagonistically with WRKY8 to regulate sodium and potassium homeostasis under salt stress. {ECO:0000269|PubMed:23451802}.	cellular potassium ion homeostasis [GO:0030007]; cellular sodium ion homeostasis [GO:0006883]; negative regulation of DNA-binding transcription factor activity [GO:0043433]; negative regulation of response to salt stress [GO:1901001]
	Lus10010349	12818508	12820019	+	1433_PEA		14-3-3-like protein
	Lus10010350	12811455	12816680	+	FB92_ARATH	At1g78280 F3F9.18	F-box protein At1g78280		ath:AT1G78280
	Lus10010351	12807300	12809215	-	FBW2_ARATH	FBW2 SKIP18 At4g08980 T3H13.1	F-box protein FBW2 (SKP1-interacting partner 18)	Nucleus {ECO:0000250}.	ath:AT4G08980	Component of SCF(ASK-cullin-F-box) E3 ubiquitin ligase complexes, which may mediate the ubiquitination and subsequent proteasomal degradation of target proteins. {ECO:0000250}.	negative regulation of gene expression [GO:0010629]; posttranscriptional regulation of gene expression [GO:0010608]; protein ubiquitination [GO:0016567]; response to abscisic acid [GO:0009737]; SCF-dependent proteasomal ubiquitin-dependent protein catabolic process [GO:0031146]; ubiquitin-dependent protein catabolic process [GO:0006511]
	Lus10010352	12799426	12800402	+	EXOL2_ARATH	EXL2 At5g64260 MSJ1.10	Protein EXORDIUM-like 2	Secreted. Secreted, extracellular space. Secreted, extracellular space, apoplast {ECO:0000305}.	ath:AT5G64260	May play a role in a brassinosteroid-dependent regulation of growth and development. {ECO:0000250}.	cellular response to hypoxia [GO:0071456]
	Lus10010353	12792575	12795315	-	PMTT_ARATH	QUA2 OSU1 TSD2 At1g78240 F3F9.21 T11I11.18	Probable pectin methyltransferase QUA2 (EC 2.1.1.-) (Protein OVERSENSITIVE TO SUGAR 1) (Protein QUASIMODO 2) (Protein TUMOROUS SHOOT DEVELOPMENT 2)	Golgi apparatus membrane {ECO:0000269|PubMed:17425712, ECO:0000269|PubMed:17461780}; Single-pass type II membrane protein {ECO:0000269|PubMed:17425712, ECO:0000269|PubMed:17461780}.	ath:AT1G78240	May be involved in the synthesis of homogalacturonan. Required for normal cell adhesion and plant development. {ECO:0000269|PubMed:17425712, ECO:0000269|PubMed:17461780, ECO:0000269|PubMed:18167546}.	cell adhesion [GO:0007155]; homogalacturonan biosynthetic process [GO:0010289]; methylation [GO:0032259]; response to cytokinin [GO:0009735]; root development [GO:0048364]; shoot system development [GO:0048367]
	Lus10010354	12789710	12791472	-	APRL4_ARATH	APRL4 At1g34780 F11O6.7 F21H2.1	5'-adenylylsulfate reductase-like 4 (Adenosine 5'-phosphosulfate reductase-like 4) (APR-like 4) (AtAPRL4)	Membrane {ECO:0000305}; Single-pass membrane protein {ECO:0000305}.	ath:AT1G34780
	Lus10010355	12782776	12788557	-
	Lus10010356	12774055	12780849	-	FTSI5_ARATH	FTSHI5 EMB2458 At3g04340 T6K12.4	Probable inactive ATP-dependent zinc metalloprotease FTSHI 5, chloroplastic (AtFTSHI5) (Protein EMBRYO DEFECTIVE 2458) (Protein FTSH INACTIVE PROTEASE 5)	Plastid, chloroplast membrane {ECO:0000255}; Multi-pass membrane protein {ECO:0000255}.	ath:AT3G04340	Required for plastid development during embryogenesis (PubMed:24964212). Might be involved in chaperone functions or play a structural role in the thylakoid FtsH complex (Probable). {ECO:0000269|PubMed:24964212, ECO:0000305}.	cell redox homeostasis [GO:0045454]; chloroplast organization [GO:0009658]; protein import into chloroplast stroma [GO:0045037]; proteolysis [GO:0006508]; regulation of photorespiration [GO:0080093]
	Lus10010357	12772626	12773673	+	RICE1_ARATH	RICE1 At3g11770 F26K24.6	Protein RISC-INTERACTING CLEARING 3'-5' EXORIBONUCLEASE 1 (EC 3.1.13.1)	Cytoplasm {ECO:0000269|PubMed:28463111}.	ath:AT3G11770	3'-to-5' exoribonuclease (RNase) specifically targeting single-stranded RNAs (PubMed:28463111). Triggers miRNA accumulation in RNA-induced silencing complex (RISC), composed of miRNAs and AGO proteins, by degrading uridylated cleavage fragments (PubMed:28463111). Required during plant growth and development (PubMed:28463111). {ECO:0000269|PubMed:28463111}.	gene silencing by RNA [GO:0031047]; positive regulation of miRNA metabolic process [GO:2000630]
	Lus10010358	12769122	12770978	+	ASOL_BRANA	Bp10	L-ascorbate oxidase homolog (EC 1.10.3.-)	Secreted {ECO:0000305}.	bna:106452325	Probable oxidase that may be involved in pollen tube growth. {ECO:0000250}.
	Lus10010359	12766006	12768108	-	SKA1_ARATH	At3g60660 T4C21_70	Spindle and kinetochore-associated protein 1 homolog		ath:AT3G60660		cell division [GO:0051301]; chromosome segregation [GO:0007059]; mitotic cell cycle [GO:0000278]; regulation of microtubule polymerization or depolymerization [GO:0031110]
